# Supplementary material
Source: ML conference proceedings conference paper supplement (https://openreview.net/forum?id=MDMV2SxCboX)
Supplement: supplementary_material [file attachment]

---

# Why Do Pretrained Language Models Help in Downstream Tasks? An Analysis of Head and Prompt Tuning

---

Colin Wei Sang Michael Xie Tengyu Ma

Department of Computer Science  
Stanford University

{colinwei,xie,tengyuma}@cs.stanford.edu

## Abstract

Pretrained language models have achieved state-of-the-art performance when adapted to a downstream NLP task. However, theoretical analysis of these models is scarce and challenging since the pretraining and downstream tasks can be very different. We propose an analysis framework that links the pretraining and downstream tasks with an underlying latent variable generative model of text — the downstream classifier must recover a function of the posterior distribution over the latent variables. We analyze head tuning (learning a classifier on top of the frozen pretrained model) and prompt tuning in this setting. The generative model in our analysis is either a Hidden Markov Model (HMM) or an HMM augmented with a latent memory component, motivated by long-term dependencies in natural language. We show that 1) under certain non-degeneracy conditions on the HMM, simple classification heads can solve the downstream task, 2) prompt tuning obtains downstream guarantees with weaker non-degeneracy conditions, and 3) our recovery guarantees for the memory-augmented HMM are stronger than for the vanilla HMM because task-relevant information is easier to recover from the long-term memory. Experiments on synthetically generated data from HMMs back our theoretical findings.

## 1 Introduction

Natural language processing (NLP) has been revolutionized by large-scale pretrained language models such as BERT [4] and GPT [25], which are adapted to a variety of downstream NLP tasks. Although a large body of empirical work seeks to understand the effectiveness of pretrained models [7, 5, 12, 35, 34, 11, 27, 15], theoretical understanding is scarce. Theoretically analyzing the relationship between the pretraining and downstream tasks is challenging because pretraining and downstream settings can greatly differ.

The key starting point for our analysis is to link the pretraining and downstream settings through an underlying generative model of the data. We model the data distribution as a latent variable model and the downstream task as a function of the latent variables. Assuming that pretraining on a large corpus allows us to learn the generative model, the conditional token probabilities predicted by the pretrained model carry information about the hidden variables. In downstream adaptation, we aim to recover this information to solve the downstream task.

Though full finetuning is the de facto empirical standard, analyzing it is challenging because it requires characterizing the weights of the pretrained model. In this paper, we focus on *head tuning*

and prompt tuning, which both freeze all pretrained parameters and allow us to treat the pretrained model as a black box. Head tuning [22] trains task-specific heads on top of the pretrained model outputs. Prompt tuning [31, 19, 9, 21] optimizes a task-specific “prompt” that is concatenated to the model input. Studying prompt tuning is particularly interesting since it can match the performance of full finetuning with less computation time [19, 9, 21].

Our work contrasts with prior theoretical work [28], which *assumes* that downstream labels are recoverable via a linear head applied to the conditional token probabilities, and analyze how errors in pretraining or model misspecification propagate downstream. We consider specific generative distributions for which we can *prove* these assumptions, showing that head and prompt tuning can recover the downstream labels.

Our analysis considers two data-generating distributions with increasing realism. First, we consider data generated from a Hidden Markov Model (HMM), where the downstream task is to learn a linear classifier on the posterior distribution over the hidden states (Section 3). We prove that, under strong non-degeneracy conditions on token emission probabilities, a linear head applied to a pretrained model  $G$  which outputs exact conditional token probabilities ( $G_i(x) = P[X_i | x_{-i}]$ ) can recover the downstream label (Theorem 3.3). Furthermore, we can prove better recovery guarantees with relaxed non-degeneracy assumptions (Assumption 3.1) by using continuous prompt tuning (Theorem 3.6), reflecting the strong empirical performance of prompt tuning [19, 9, 21]. Intuitively, prompt tuning conditions the latent variables so that nonessential information for the downstream task can be ignored during the tuning phase, making task-essential information easier to recover.

Second, we also strengthen our analysis by leveraging additional structure in the data. Motivated by long-range dependences in natural language, we analyze HMM variants with additional latent “memory” variables that can store long-term information more easily than vanilla HMMs (Section 4). Here, the downstream task is to learn a linear classifier on the posterior distribution of the memory variables. We show that, under weaker non-degeneracy conditions than the first setting, an attention-based classification head can recover ground-truth downstream labels from pretrained model outputs (Theorem 4.3). Intuitively, our recovery guarantees improve because the classification head can focus on the persistent, task-essential information in the memory while ignoring other transient and nonessential aspects of the latent variables. As with the vanilla HMM, we analyze prompt tuning for relaxing the non-degeneracy conditions even further (Theorem 4.6).

In summary, we relate the pretraining and downstream tasks by assuming that the downstream task is to learn a classifier on the posterior distributions of the latent variables defined by an underlying generative model of text. Our theoretical contributions are: 1) in this setting we analyze an HMM generative model show that simple classification heads can recover the true downstream labels under certain non-degeneracy assumptions, 2) we prove that soft prompt tuning can relax the non-degeneracy assumptions needed for downstream recovery making it easier to extract task-specific information, and 3) our recovery guarantees are stronger for memory-augmented HMMs in comparison to the vanilla HMM when tuning an attention-based classification head.

We empirically evaluate our theoretical results with language models pretrained on synthetically generated data from HMMs. We find that prompt tuning obtains good downstream performance when our non-degeneracy conditions are relaxed, whereas head tuning performs poorly. Furthermore, we show that head tuning obtains better downstream performance when data is generated from a memory-augmented HMM, compared to a vanilla HMM, as is predicted by our theory.

## 1.1 Related works

The black box nature of BERT and related models has inspired a variety of empirical works which seek to understand them. Probing papers study whether a pretrained model computes various types of structured information (e.g., syntactic [35, 11]) by evaluating the performance of simple classifiers, or probes, on the representations [7, 12, 34, 27, 15]. Other papers ablate various aspects of pretraining, such as changing the masking scheme [14, 20, 40] or permuting the word order [32].

In comparison, theoretical analysis of pretrained language models is limited. Besides [28], which we discussed in Section 1, Zhang and Hashimoto [40] analyze using a linear classifier to approximately recover the latent variable in a Gaussian graphical model with sparse dependencies between observed variables. However, their analysis and setting are focused towards understanding syntactic dependencies between tokens, whereas we directly model and analyze downstream performance.

Prompt-based tuning [31, 19, 9, 21, 13, 6, 41, 2, 23], which has improved empirical downstream performance for lightweight adaptation methods beyond head tuning to approach full finetuning, is an important focus of our theoretical analysis. Shin et al. [31] employ task-specific prompts that are optimized over the discrete token space. Schick and Schütze [29, 30] reformulate natural language tasks as cloze-style phrases to enable few-shot learning. Subsequent methods [19, 9, 21] optimize “soft” prompts, or continuous embedding vectors. Lester et al. [19] employ soft prompts on pretrained large-scale T5 [26] models and show that as the model size increases, prompt tuning performance can eventually match finetuning. Hambardzumyan et al. [9] applies a variant of soft prompt tuning to MLM models. Li and Liang [21] propose prefix tuning, which prepends a trainable prefix embedding sequence to all layers of the transformer.

More broadly, Lee et al. [18] analyze reconstruction-based self-supervised learning methods in a general setting and show that under certain conditional independence assumptions, predicting one observed variable from another allows recovery of the latent with a linear head. Other theoretical works analyzing self-supervised or constrastive learning include [1, 10, 36, 38, 37], but they do not directly relate to our particular setting.

## 2 Formulations and notations

We analyze models pretrained on masked language modeling (MLM) objectives. Let  $\mathcal{X}$  denote a finite vocabulary of input tokens,  $\mathcal{X}^*$  the set of variable-length sequences of tokens, and  $X = (X_1, \dots, X_T) \in \mathcal{X}^*$  a random sequence of  $T$  tokens. Let  $\Delta^{|\mathcal{X}|}$  denote the space of probability distributions over tokens.

**Pretraining and downstream task.** Let  $G(x) = (G_1(x), G_2(x), \dots)$  denote the masked language model which predicts a probability vector for each timestep in the input  $x$ . Our theoretical abstraction is that  $G_i$  perfectly computes the distribution of  $X_i$ , the  $i$ -th token, conditioned on all other tokens:  $G_i(x) = P[X_i | X_{-i} = x_{-i}]$ . Here  $P[X_i | X_{-i} = x_{-i}] \in \Delta^{|\mathcal{X}|}$  is a probability vector. In particular,  $G_i(x)$  does not depend on  $x_i$ . The downstream task involves labeled examples  $(x, F^*(x)) \in \mathcal{X}^* \times \mathcal{Y}$ , where  $F^* : \mathcal{X}^* \rightarrow \mathcal{Y}$  provides ground-truth downstream labels and  $\mathcal{Y}$  is a discrete set of labels for classification.

**Head and prompt tuning.** Head tuning trains a classification head  $f$  on top of fixed model outputs, resulting in the classifier  $F(x) = \mathbb{1}(f(G(x)) \geq 0)$ . We expect  $f$  to be a simple function such as a linear or one layer attention model. We also analyze variants where  $f$  also takes the tokens  $x$  or embeddings of  $x$  as input, which provides additional information. Soft prompt tuning requires viewing the pretrained model  $G$  as a function of the token embeddings; we refer to this model by  $\bar{G}$ . Letting  $e(x) = (e(x_1), \dots, e(x_t))$  denote the token embeddings, we have  $\bar{G}(e(x)) = G(x)$ . Soft prompt tuning concatenates a trainable prompt  $u$  so that the model output is  $\bar{G}((u, e(x)))$ . We consider simultaneously training the prompt parameter  $u$  and a classification head to fit the downstream task.

**Notations.** Let  $\Delta^d$  denote the space of  $d$ -dimensional probability vectors. We work with discrete random variables  $V$  taking values in a finite set  $\mathcal{V}$ . We use  $P[V] \in \Delta^{|\mathcal{V}|}$  to denote the distribution of  $V$  and  $P[U | V = v] \in \mathbb{R}^{|\mathcal{U}|}$  the conditional distribution of  $U$  given  $V = v$ .  $\Pr(V = v) \in [0, 1]$  will denote the probability that  $V$  takes values  $v$ . We also let  $P[U = u | V] \in \mathbb{R}^{|\mathcal{V}|}$  denote the vector with entries  $\Pr(U = u | V = v)$ .  $P[U | V] \in \mathbb{R}^{|\mathcal{U}| \times |\mathcal{V}|}$  will describe the matrix with entries  $P[U | V]_{u,v} = \Pr(U = u | V = v)$ .

For a sequence  $v = (v_1, \dots, v_t)$ , we use the notation  $v_{i:j}$  for  $i \leq j$  to denote  $(v_i, \dots, v_j)$ , and  $v_{-i}$  to denote  $(v_{1:i-1}, v_{i+1:t})$ . We let  $\mathbb{1}$  denote the indicator function. For set  $\mathcal{V}$ , we let  $\mathcal{V}^* = \mathcal{V}^1 \cup \mathcal{V}^2 \cup \dots$  denote variable-length sequences of elements of  $\mathcal{V}$ . Let  $\odot$  denote elementwise product. Let  $\mathbf{1}_d, \mathbf{0}_d$  denote the  $d$ -dimensional all-1’s and all-0’s vector. We omit the subscript if the dimension is clear from context. For two vectors  $a, b \in \mathbb{R}^d$ , we let  $a/b$  denote their element-wise division. We use  $\text{supp}(a)$  to denote the set of indices where vector  $a$  is non-zero.

## 3 Analysis for Hidden Markov Models

Defining a relation between pretraining and downstream tasks is the foremost challenge for analysis. We propose to link the two via latent variable generative assumptions on the input distribution. We

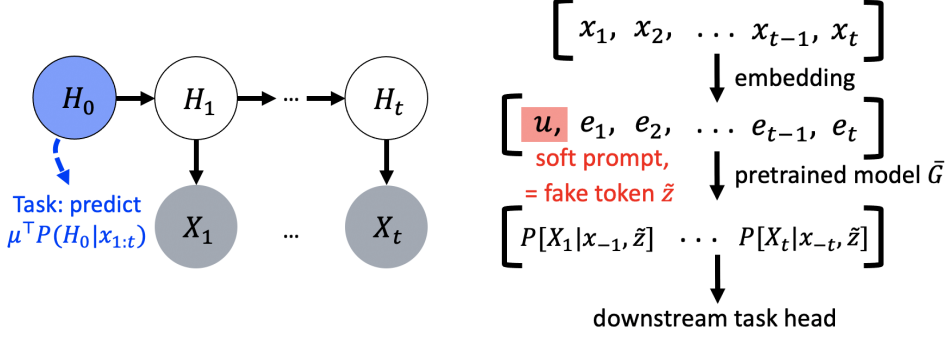

Figure 1: **Left:** Illustration of HMM graphical model. **Right:** Overview of the formulation and analysis setting for prompt (and head) tuning. To abstractify soft prompt tuning, we note that every token has a natural embedding, the corresponding row of the emission probability matrix. We view prompt tuning as adding a fake token  $\tilde{z}$  to the vocabulary, assigning it a row  $u$  in the emission matrix, and prepending it to the input embedding sequence. More details are provided in Section 3.1.

model the downstream task as a function of the posterior distribution of the latent variables. Towards a first result, this section studies the case where inputs are generated by HMMs (see Figure 1 (left)), which have been well-studied in the context of language and speech processing (see e.g. [24, 17, 3]).

**Data distribution.** Let  $\mathcal{H}$  denote the hidden state space of the HMM. We use  $H = (H_0, H_1, \dots, H_T) \in \mathcal{H}^*$  to denote the sequence of hidden states. For all timesteps  $i > 0$ , the transition probabilities are time-invariant, i.e.  $P[H_i | H_{i-1}] = A$  for  $A \in \mathbb{R}^{|\mathcal{H}| \times |\mathcal{H}|}$ . For each timestep  $i \geq 1$ , tokens  $X_i$  are emitted following some time-invariant probability:  $P[X_i | H_i] = W$  for  $W \in \mathbb{R}^{|\mathcal{X}| \times |\mathcal{H}|}$ . The joint probability of  $X, H$  is

$$\Pr(X, H = x, h | T = t) = \Pr(H_0 = h_0) \prod_{i=1}^t \Pr(H_i = h_i | H_{i-1} = h_{i-1}) \Pr(X_i = x_i | H_i = h_i).$$

**Downstream tasks.** We assume that  $H_0$  has the meaningful information for the downstream task, which is a binary classification task where the ground-truth labeling  $F^*$  is assumed to be a linear classifier on the posterior  $P[H_0 | X_{1:T} = x]$ :

$$F^*(x) = \mathbb{1}(\mu^\top P[H_0 | X_{1:T} = x] \geq 0) \quad (3.1)$$

for  $\mu \in \mathbb{R}^{|\mathcal{H}|}$ . Our results are easily extended to the multiclass setting. We consider tuning a linear head for the downstream classifier, which formally computes  $\mathbb{1}(b^\top G_1(x) \geq 0)$  for  $b \in \mathbb{R}^{|\mathcal{X}|}$ . The following non-degeneracy condition is crucial for our recovery result in this setting.

**Assumption 3.1** (Non-degeneracy, vanilla HMM). *The token emission probability matrix  $W$  has linearly independent columns.*

We also require the following regularity conditions on  $H_0$  and the state transitions.

**Assumption 3.2** (Regularity). *The Markov chain  $H_0, H_1, \dots$  is ergodic, and  $P[H_0]$  has full support.*

We show that if  $W$  has linearly independent columns, a linear head fits downstream labels.

**Theorem 3.3.** *Assume that non-degeneracy (Assumption 3.1) and regularity (Assumption 3.2) hold. Then any downstream task  $F^*(x)$  of the form (3.1) can be computed by a linear head on  $G$  applied to a shifted sequence. That is, there exists linear head weights  $b \in \mathbb{R}^{|\mathcal{X}|}$  such that for all  $x \in \text{supp}(P[X])$ ,*

$$F^*(x) = \mathbb{1}(b^\top G_1(x') \geq 0)$$

where  $x' = (\varnothing, x_{1:t})$  is the concatenation of a special token  $\varnothing$  with  $x$ .<sup>1</sup>

The key for the proof is to leverage the following general statement about random variables  $U, V, Z$  such that  $U \perp V | Z$ , which decomposes the expression for  $P[U | V]$ .

<sup>1</sup>We note that  $G_1(x')$  does not depend on  $x'_1$  and therefore  $x'_1$  can be any token.

**Proposition 3.4.** *Let  $U, V, Z$  be random variables such that  $U \perp V \mid Z$ . Then for any  $v$ ,  $P[U \mid V = v] = P[U \mid Z] \cdot P[Z \mid V = v]$ . Thus, if  $P[U \mid Z]$  has a left inverse  $(P[U \mid Z])^\dagger$ , then  $P[Z \mid V = v] = (P[U \mid Z])^\dagger P[U \mid V = v]$ .*

By the conditional independence structure of the HMM, Proposition 3.4 immediately implies

$$G_1(x') = WP[H_1 \mid X_{2:T+1} = x] \implies P[H_1 \mid X_{2:T+1} = x] = W^\dagger G_1(x')$$

where  $W^\dagger$  is the left inverse for  $W$ , guaranteed to exist by Assumption 3.1. This lets us recover  $P[H_1 \mid X_{2:T+1} = x]$  by applying a linear function to  $G_1(x')$ . Additional linear functions will be sufficient to obtain  $\mu^\top P[H_0 \mid X_{1:T} = x]$  from  $P[H_1 \mid X_{2:T+1} = x]$ . We provide the full proof in Section B.

Proposition 3.4 is reminiscent of the arguments of [18], which leverages the independence structure in the same way. Subsequent sections will require more complicated analyses and recovery procedures.

A drawback of Theorem 3.3 is that it relies heavily on assuming  $W$  has full column rank, which implies the necessary condition that  $|\mathcal{H}| \leq |\mathcal{X}|$ . Without this assumption, it is unclear how to recover  $P[H_0 \mid X_{1:T} = x]$  from  $G(x)$  alone. However, in realistic settings we would expect  $|\mathcal{H}| > |\mathcal{X}|$ , as increasing the size of the hidden state space improves language modeling capabilities of HMMs [3].

### 3.1 Relaxed non-degeneracy assumptions via prompt tuning

In this section, we study applying soft, or continuous, prompt tuning [19, 9] to the setting above. We show that by using soft prompt tuning, we can recover  $F^*$  using a linear head on  $G$  for HMMs where the non-degeneracy assumptions on  $W$  are relaxed. Our analysis provides insight into the empirical successes of prompt-tuning: intuitively, prompt tuning enables better recovery of the downstream task by conditioning the output of  $G$  to only contain task-specific information.

Soft prompt tuning trains task-specific embedding vectors, but analyzing how the model processes embedding vectors is challenging because it requires opening up the black box of the pretrained model. Thus, we require additional abstractions about how the pretrained model processes the embedding vectors. We will extend the mask language model  $G$  to a model  $\bar{G}$  that maps a sequence of embeddings  $e_1, \dots, e_t$  to conditional probabilities  $G_1(x), \dots, G_t(x)$  as follows. We observe that each token  $z$  in the vocabulary  $\mathcal{X}$  naturally corresponds to a  $|\mathcal{H}|$ -dimensional vector: the  $z$ -th row of the emission probability matrix  $W$ , or equivalently,  $P[X_i = z \mid H_i]$ . We denote this embedding by  $e(z)$  and call the family of embeddings  $\{e(z) : z \in \mathcal{X}\}$  proper embeddings. A fundamental property of HMMs is that the conditional probability  $P[X_i \mid X_{-i} = x_{-i}]$  only depends on  $x_1, \dots, x_t$  through their embeddings  $e(x) = (e(x_1), \dots, e(x_t))$ . In other words, there exists a function  $\bar{G}_i$  such that

$$G_i(x_1, \dots, x_t) = \bar{G}_i(e(x_1), \dots, e(x_t))$$

In particular, we let  $\bar{G}_i$  compute the standard message passing algorithm [16] that computes the conditional probability of HMMs. This ensures that  $\bar{G}_i$  is well defined on all sequences of nonnegative vectors in  $[0, 1]^{|\mathcal{H}|}$ , beyond sequences of proper embeddings. We assume that pretraining produces this  $\bar{G}_i$ , which we treat as a blackbox for prompt tuning.

In particular, for prompt tuning we can consider the case where we pass an arbitrary nonnegative vector  $u \in [0, 1]^{|\mathcal{H}|}$  to  $\bar{G}$  in the first argument and proper embeddings at positions  $i > 1$ . We can interpret  $u$  as the embedding of a fake token  $\tilde{z}$ . Concretely, consider adding a new token  $\tilde{z}$  to the vocabulary  $\mathcal{X}$ , and changing the emission probability at position 1 to satisfy  $P[X_1 = \tilde{z} \mid H_1] = u$  and for all  $z \neq \tilde{z}$ ,  $P[X_1 = z \mid H_1] \propto (1 - u) \odot e(z)$ . Then  $\bar{G}_i(u, e(x_1), \dots, e(x_t))$  precisely computes the conditional probability  $P[X_i \mid X_{-i} = (\tilde{z}, x_1, \dots, x_t)_{-i}]$  under the modified HMM. We refer the readers to Section C for the formal definition of  $\bar{G}_i$  and formal proofs of the interpretation above.

We consider a downstream training algorithm which trains the prompt tuning parameter  $u$  described above and a linear classification head. Letting  $u$  denote the trainable prompt parameter and  $b \in \mathbb{R}^{|\mathcal{X}|}$  the trainable linear head weights, the model uses the embedding sequence

$$\hat{e}(x) \triangleq (u, e(\emptyset), e(x_1), \dots, e(x_t)) \tag{3.2}$$

and outputs the prediction  $F(x) = \mathbb{1}(b^\top G_2(\hat{e}(x)) \geq 0)$ . We can provide recovery guarantees for this model if the ground-truth classifier weights  $\mu$  (defined in (3.1)) and columns of the HMM transition matrix  $A$  satisfy the following relaxation of the requirement in Theorem 3.3 that  $W$  is nondegenerate.

**Assumption 3.5** (Relaxed non-degeneracy condition). *There exists a set of essential hidden states  $\mathcal{H}^* \subseteq \mathcal{H}$ , so that the columns of  $W$  corresponding to  $\mathcal{H}^*$ ,  $\{W_{:,h}\}_{h \in \mathcal{H}^*}$ , are linearly independent. Furthermore,  $\mathcal{H}^*$  covers all meaningful information for the downstream tasks:  $\text{supp}(\mu) \subseteq \mathcal{H}^*$ .*

*In addition, a last technical requirement on  $\mathcal{H}^*$  is as follows: there exists a set  $\mathcal{B} \subseteq \mathcal{H}$  such that  $\mathcal{H}^* = \cup_{h \in \mathcal{B}} \text{supp}(A_{:,h})$ . In other words,  $\mathcal{H}^*$  must be the set of all states reachable by starting from some state in  $\mathcal{B}$  and transitioning one step in the hidden Markov chain.*

Compared to Assumption 3.1, which required that *all* columns of  $W$  are linearly independent, Assumption 3.5 only requires linear independence on a subset  $\mathcal{H}^*$  of essential states. In the setting where  $|\mathcal{H}| > |\mathcal{X}|$ , the condition for Theorem 3.3 can never hold. On the other hand, Assumption 3.5 could still hold, for example, if  $|\text{supp}(\mu)| < |\mathcal{X}|$  and the set of columns of  $W$  corresponding to hidden states in  $\text{supp}(\mu)$  is linearly independent. The last technical requirement in Assumption 3.5 is also required, which could be satisfied if columns of  $A$  are sparse. The following theorem shows that when Assumption 3.5 holds, we can recover  $F^*$  using soft prompt tuning with a linear head.

**Theorem 3.6.** *In the above setting, assume that Assumptions 3.2 and 3.5 hold. Then  $F^*$  can be computed using soft prompt tuning with a linear head on  $\bar{G}$ . Concretely, there is a continuous prompt parameter  $u \in \mathbb{R}^{|\mathcal{H}|}$  and weight vector  $b \in \mathbb{R}^{|\mathcal{X}|}$ , such that for all  $x \in \text{supp}(P[X])$ ,*

$$F^*(x) = \mathbb{1}(b^\top \bar{G}_2(\hat{e}(x)) \geq 0)$$

where  $\hat{e}$  prepends  $u$  to the input embedding sequence, as defined in (3.2).

Theorem 3.6 provides a stronger recovery result than Theorem 3.3, which only used a linear head. This is also reflected in our synthetic experiments (Section 5), and prior work which shows that variants of prompt tuning can perform much better than only training the last few layers of the model [21]. Our theory suggests that prompt tuning could help by conditioning the hidden variables to remove nonessential information for the task from the output of  $G$ . This makes task-essential information easier to recover.

The key proof intuition is that although recovering  $P[H_0 | X_{1:T} = x]$  is impossible without strong non-degeneracy conditions (Assumption 3.1), we can aim to recover  $P[H_0 | \bar{X}_{1:T} = x]$  on the subset of essential states  $\mathcal{H}^*$  defined in Assumption 3.5, which suffices for computing  $\mu^\top P[H_0 | X_{1:T} = x]$ , since  $\mathcal{H}^* \supseteq \text{supp}(\mu)$ . To recover  $P[H_0 | X_{1:T} = x]$  on  $\mathcal{H}^*$ , we observe in Lemma C.2 that prepending the prompt  $u$  is equivalent to introducing a modified random sequence  $\hat{X}$  and fake token  $\tilde{z}$  which influences the posterior of  $H_2$  as follows:

$$\bar{G}_2(\hat{e}(x)) = r_x WD(P[H_2 | \hat{X}_1 = \tilde{z}] \odot P[H_0 | X_{1:T} = x]) \quad (3.3)$$

for invertible diagonal matrix  $D$  and positive scalar  $r_x$ . We choose  $u$  so  $P[H_2 | \hat{X}_1 = \tilde{z}] \odot P[H_0 | X_{1:T} = x]$  is supported only on  $\mathcal{H}^*$ . As corresponding columns of  $W$  are linearly independent (Assumption 3.5), we recover  $\Pr(H_0 = h | X_{1:T} = x)$  for  $h \in \mathcal{H}^*$  via a linear function of  $\bar{G}_2(\hat{e}(x))$ . This suffices for computing  $\mu^\top P[H_0 | X_{1:T} = x]$ . For more details, see Section C.

## 4 Analysis for memory-augmented Hidden Markov Models

We study a memory-augmented HMM which explicitly disentangles the evolution of hidden states from a persistent “memory” variable. Inspired by natural sentences, this model is intended to better capture the distinction between syntax, which constantly evolves, and semantics, which changes less. This additional structure in the generative model allows us to strengthen our results by relaxing the non-degeneracy conditions on  $W$ , the token emission probabilities. Thus, both head and prompt tuning are more powerful in this setting compared to Section 3 and can recover the downstream label with weaker non-degeneracy assumptions on  $W$ . In Section 4.2, we show that soft prompt tuning also provides an advantage over head tuning alone.

**Data distribution.** The memory-augmented HMM, depicted in Figure 2, can be viewed as a generative variant of memory networks [39, 33] and is closely related to Hidden Topic Markov Models [8]. There are two sets of latent variables in the memory-augmented HMM: a Markov chain on hidden states  $H_0, H_1, \dots$ , meant to model the evolution of syntax, and a persistent “memory”  $M = (M_1, \dots, M_N)$  with  $N$  total cells, where each  $M_i$  takes values in a finite set  $\mathcal{M}$ . The full joint

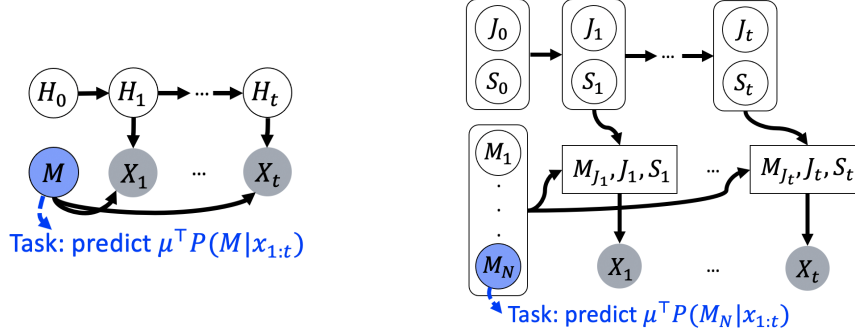

Figure 2: **Left:** Memory-augmented HMM with a single memory cell. The memory  $M$  and hidden state  $H_i$  determine the emission probabilities for each state  $X_i$ . **Right:** Memory-augmented HMM with multiple memories  $M_1, \dots, M_N$ . The hidden state  $H_i$  consists of a cell index  $J_i$  and syntax state  $S_i$ . To sample  $X_i$ , we first look up the  $J_i$ -th memory cell  $M_{J_i}$ . The token emission probability is then determined by the tuple  $(M_{J_i}, J_i, S_i)$ .

probability is as follows:

$$\Pr(X, H, M = x, h, m | T = t) = \Pr(M = m) \Pr(H_0 = h_0) \prod_{i=1}^t \Pr(H_i = h_i | H_{i-1} = h_{i-1}) \Pr(X_i = x_i | M = m, H_i = h_i)$$

The hidden state is modified to explicitly consist of a disentangled cell index  $J \in [N]$  and syntax state  $S \in \mathcal{S}$ , such that  $H_i = (J_i, S_i)$  and  $\mathcal{H} = [N] \times \mathcal{S}$ . To sample the token at timestep  $i$  given the hidden state  $H_i = (J_i, S_i)$ , we first use  $J_i$  to index the memory  $M$ , obtaining the random variable  $M_{J_i}$ .  $X_i$  is then sampled according to some time-invariant probability depending on  $M_{J_i}, J_i, S_i$ :

$$P[X_i | M = m, H_i = (j, s)] = P[X_i | M_{J_i} = m_j, H_i = (j, s)] = W_{:, (m_j, j, s)}$$

Here  $W \in \mathbb{R}^{|\mathcal{X}| \times |\mathcal{M}| \times |\mathcal{H}|}$  stores the emission probabilities for each choice of memory cell value and hidden state. Note that in particular, the conditional probabilities for  $X_i$  only depend on a single memory cell for each timestep. We also note that memory-augmented HMMs can be viewed as vanilla HMMs with structured transitions because  $(H_0, M), (H_1, M), \dots$  can be viewed as a Markov chain where the memory component does not change.

**Example 4.1** (Generating natural sentence with memory-augmented HMM). *We consider how this model may generate the sentence “The cow in the pasture rolled on the grass’ happily.”  $M_1$  could store the subject (“cow”),  $M_2$  the location (“pasture”),  $M_3$  the sentiment (“happily”), and  $S_i$  could determine part-of-speech. For timesteps where “cow” and “rolled” are emitted  $J_i = 1$  because we emit information related to the sentence subject. Timesteps for “pasture” and “grass” have  $J_i = 2$ .*

**Downstream tasks.** We consider downstream tasks where ground-truth labels are obtained via a linear classifier on the posterior distribution of a particular memory cell  $j^* \in [N]$ :  $F^*(x) = \mathbb{1}(\mu^\top P[M_{j^*} | X_{1:T} = x] \geq 0)$ , where  $\mu \in \mathbb{R}^{|\mathcal{M}|}$ . Intuitively, this formulation models downstream tasks which depend on a particular aspect of the semantics but not on syntax (e.g. in the setting of Example 4.1, if  $j^* = 3$ , the task is sentiment analysis).

#### 4.1 Tuning attention head for recovering ground-truth downstream labels

To recover the downstream labeling, we require an attention-based classification head, which is a function of both the input embeddings and outputs of  $G$ . Formally, let  $q \in \mathbb{R}^{|\mathcal{H}|+1}$  denote a query parameter and  $\beta_1, \dots, \beta_t \in \mathbb{R}^{|\mathcal{H}|+1}$  denote trainable position embeddings. Given pretrained model outputs  $G_i(x)$  and trainable token embeddings  $e(x_i)$ , the attention head  $\text{Attn}(\cdot)$  applies key and value functions  $K, V$  to compute the output as follows:

$$\mathcal{I} \triangleq \arg \max_i \{q^\top (K(G_i(x)) + \beta_i)\} \quad (4.1)$$

$$\text{Attn}((G_i(x), e(x_i))_{i=1}^t) \triangleq \frac{1}{|\mathcal{I}|} \sum_{i \in \mathcal{I}} V(G_i(x), e(x_i)) \quad (4.2)$$

where  $\arg \max$  refers to the set of indices achieving the maximum in (4.1). We note that standard attention heads in practice rely on the softmax function, but the expression based on  $\arg \max$  above captures the limiting behavior as  $\|q\|_2 \rightarrow \infty$ . We consider linear key functions given by  $K(G_i(x)) = \Theta^{(K)} G_i(x)$ . The value function  $V : \mathbb{R}^{|\mathcal{X}|} \times \mathbb{R}^{|\mathcal{M}||\mathcal{H}|} \rightarrow \mathbb{R}$  uses parameters  $\Theta^{(V)} \in \mathbb{R}^{|\mathcal{M}||\mathcal{H}| \times |\mathcal{X}|}$  and  $b \in \mathbb{R}^{|\mathcal{M}||\mathcal{H}|}$  and computes  $V(G_i(x), e(x_i)) = b^\top ((\Theta^{(V)} G_i(x)) \odot e(x_i))$ .

Because our generative model disentangles  $H$  and  $M$ , we can relax the non-degeneracy assumption on the token emission probabilities  $W$ , compared to Theorem 3.3. The relaxed assumption only requires the columns  $\{W_{:, (m, h)}\}_{m \in \mathcal{M}, h \in \mathcal{H}^*}$  to be linearly independent in a subset  $\mathcal{H}^*$  of “recoverable” hidden states, whereas Assumption 3.1 required all columns to be linearly independent.

**Assumption 4.2** (Existence of “recoverable” hidden states). *There exists a set of recoverable hidden states  $\mathcal{H}^* = \{j^*\} \times \mathcal{S}^*$ , such that the collection of token emission probabilities from  $\mathcal{M} \times \mathcal{H}^*$ ,  $\{W_{:, (m, h)}\}_{m \in \mathcal{M}, h \in \mathcal{H}^*}$ , is a linearly independent set of vectors.*

*Furthermore, the span of these vectors must be disjoint from the span of token emission probabilities from  $\mathcal{M} \times (\mathcal{H} \setminus \mathcal{H}^*)$ :  $\text{span}(\{W_{:, (m, h)}\}_{m \in \mathcal{M}, h \in \mathcal{H}^*}) \cap \text{span}(\{W_{:, (m, h')}\}_{m \in \mathcal{M}, h' \in \mathcal{H} \setminus \mathcal{H}^*}) = \{\mathbf{0}_{|\mathcal{X}|}\}$ .*

Note that the non-degeneracy condition of Theorem 3.3 would require  $\{W_{:, (m, h)}\}_{m \in \mathcal{M}, h \in \mathcal{H}}$  to be linearly independent, whereas Assumption 4.2 only requires linear independence for  $h \in \mathcal{H}^*$ . The second condition states that  $\mathcal{H}^*$  and  $\mathcal{H} \setminus \mathcal{H}^*$  are distinguishable by the token emission probabilities.

We explain Assumption 4.2 in the setting of Example 4.1. For natural language, there might be choices of  $h = (j_i, s_i)$  for which the set  $\{W_{:, (m, h)}\}_{m \in \mathcal{M}}$  of token emission probabilities is fundamentally not very diverse, and therefore not linearly independent. For example, if the syntax  $s_i$  indicates “article”, i.e. words such as “a”, “an”, and “the”, the token emission probabilities would carry little information about  $M_{j_i}$  because the choice of article does not depend much on semantics, so columns corresponding to  $s_i = \text{“article”}$  would not be linearly independent, violating Assumption 3.1. However, Assumption 4.2 allows us to avoid this issue by placing such  $h$  in  $\mathcal{H} \setminus \mathcal{H}^*$ , a set of hidden states which we can ignore, and only including hidden states which carry a lot of information about  $M$  in  $\mathcal{H}^*$ . In Example 4.1, when  $J_i = 2$  (location),  $S_i = \text{“noun”}$ , the position  $i$  should convey a lot about the location (in this case, “pasture”), so it is more reasonable to assume that  $\{W_{:, m, h}\}_{m \in \mathcal{M}}$  is linearly independent for this hidden state.

Thus, our aim is to focus on recovering information for the downstream task from positions  $i$  where  $H_i \in \mathcal{H}^*$ . Formally, we define the following set of input sequences containing positions  $i$  where the posterior of  $H_i$  given  $x_{-i}$  concentrates on  $\mathcal{H}^*$ :

$$\mathcal{R} \triangleq \{(x_1, \dots, x_t) \in \text{supp}(P[X]) : \exists i \text{ with } \text{supp}(P[H_i | X_{-i} = x_{-i}]) \subseteq \mathcal{H}^*\} \quad (4.3)$$

The following theorem shows that under Assumption 4.2, we can recover  $F^*$  using the attention head described above, if  $x \in \mathcal{R}$  is nonempty. Note that  $\mathcal{R}$  is nonempty if the posterior of  $H_i$  concentrates on  $\mathcal{H}^*$  for some  $i$ . For natural language, it is realistic to assume this can occur because syntactic aspects of a sentence are typically low-entropy when the full sentence is observed.

**Theorem 4.3.** *Assume that non-degeneracy (Assumption 4.2) and regularity (Assumption 3.2) hold. Define  $\mathcal{R}$  as in (4.3). Then there exist an attention head on  $G(x)$  and token embeddings  $e(x_i)$  such that the following holds for any  $x \in \mathcal{R}$ :*

$$F^*(x) = \mathbb{1}(\text{Attn}((G_i(x), e(x_i))_{i=1}^t) \geq 0)$$

where the function  $\text{Attn}$  is in the form described in (4.2).

The idea is to use the attention mechanism to attend to positions  $i$  where  $\text{supp}(P[H_i | X_{-i} = x_{-i}]) \subseteq \mathcal{H}^*$ . The intuition of Assumption 4.2 is that such positions are more informative for recovering the latent posteriors; indeed, from the outputs  $G_i(x)$  at such  $i$ , the value function in the attention will be able to recover  $P[M_{j^*} | X_{1:T} = x]$ . A full proof is provided in Section D.1.

## 4.2 Guarantees for prompt-tuning

Though the generative modeling assumptions in this section already allowed relaxed non-degeneracy assumptions, applying soft prompt tuning allows us to relax them even further. For simplicity, we consider the setting where there is a single memory cell, so  $M \in \mathcal{M}$ , and the downstream task is a linear classifier on the posterior of the memory:  $F^*(x) = \mathbb{1}(\mu^\top P[M | X_{1:T} = x] \geq 0)$ . This



simplified setting doesn't require the explicit disentanglement between  $J_i$  and  $S_i$  in  $H_i$ . We analyze continuous prompt-tuning in a setting where the pretrained model  $\bar{G}$  follows the same abstraction as in Section 3.1. We modify the model to take  $|\mathcal{M}||\mathcal{H}|$ -dimensional vectors, so the proper embedding for token  $z$  is given by  $e(z) = P[X_i = z|M, H_i] = W_{z,:}^\top$ . In Section D.3, we describe the formal construction and interpretation of  $\bar{G}$  in the more general setting with more memories.

Letting  $u \in \mathbb{R}^{|\mathcal{M}||\mathcal{H}|}$  denote the trainable prompt parameter, we define the input embeddings

$$\hat{e}(x) \triangleq (u, e(x_1), \dots, e(x_t)) \quad (4.4)$$

The downstream model applies an attention head to the output of  $\bar{G}$ :  $F(x) = \mathbb{1}(\text{Attn}((\bar{G}_i(\hat{e}(x)), \hat{e}_i(x))_{i=1}^{t+1}) \geq 0)$ , where  $\text{Attn}$  is defined in (4.2). An additional stationarity assumption on  $P[H_0]$  will simplify the recovery procedure (though it can be removed).

**Assumption 4.4** (Stationarity). *Assumption 3.2 holds on the Markov chain  $H_0, H_1, \dots$ . Furthermore,  $P[H_0]$  is the stationary distribution:  $P[H_0] = AP[H_0]$ , where  $A$  is the transition matrix.*

As before, we assume sparsity of  $\mu$  and some non-degeneracy of  $W$ , though the assumption is more relaxed and easier to state compared to the vanilla HMM setting.

**Assumption 4.5** (Relaxed version of Assumption 4.2). *Let  $\mathcal{M}^* \triangleq \text{supp}(\mu)$  denote the set of non-zero coordinates in  $\mu$ . There exists a set of recoverable hidden states  $\mathcal{H}^*$ , such that the collection of token emission probabilities from  $\mathcal{M}^* \times \mathcal{H}^*$ ,  $\{W_{:, (m, h)}\}_{m \in \mathcal{M}^*, h \in \mathcal{H}^*}$ , is linearly independent.*

*Furthermore, the span of these vectors must be disjoint from the span of token emission probabilities from  $\mathcal{M}^* \times (\mathcal{H} \setminus \mathcal{H}^*)$ :  $\text{span}(\{W_{:, (m, h)}\}_{m \in \mathcal{M}^*, h \in \mathcal{H}^*}) \cap \text{span}(\{W_{:, (m, h')}\}_{m \in \mathcal{M}^*, h' \in \mathcal{H} \setminus \mathcal{H}^*}) = \{\mathbf{0}_{|\mathcal{X}|}\}$ .*

We note that Assumption 4.5, and Assumption D.5 for multiple memories, are relaxations of Assumption 4.2, as they only consider memory values in  $\text{supp}(\mu)$ , whereas Assumption 4.2 considers all  $m \in \mathcal{M}$ . An additional advantage of the memory-augmented HMM is that Assumption 4.2 is simpler than Assumption 3.1 and does not require any conditions on the transition matrix  $A$ . We now state our result for recovering  $F^*$  with soft prompt tuning and an attention head.

**Theorem 4.6.** *In the setting above, suppose that non-degeneracy Assumption 4.5 and stationarity Assumption 4.4 hold. Then there exists a prompt  $u$  and attention head on  $\bar{G}(\hat{e}(x))$  and the token embeddings which can compute the ground-truth  $F^*(x)$  for any  $x \in \mathcal{R}$ , defined in (4.3):*

$$F^*(x) = \mathbb{1}(\text{Attn}((\bar{G}_i(\hat{e}(x)), \hat{e}_i(x))_{i=1}^{t+1}) \geq 0)$$

where  $\hat{e}$  is the embedding in (4.4) and  $\text{Attn}$  is defined in (4.2).

The intuition for this proof is similar to Theorem 3.6: the soft prompt conditions the memory  $M$  to concentrate on  $\text{supp}(\mu)$ . As a result, all irrelevant information to the task is removed from  $\bar{G}_i(\hat{e}(x))$ , making it easier to recover the task-specific information about the posterior of  $M$ . A more general theorem statement for the multiple memories setting, and the full proof, is provided in Section D.3

## 5 Simulations

We empirically evaluate our theoretical results by pretraining a BERT-like masked language model (MLM) [4] on synthetic data generated by an HMM. Our goal is to verify key implications of our theory in a more realistic setting where some assumptions, such as that  $G$  outputs exact conditional probabilities, may not hold. First, we compare head and prompt tuning and show that prompt tuning improves downstream performance, especially when the recovery problem is degenerate. Second, we compare the effect of changing the data distribution from vanilla HMMs to memory-augmented HMMs on head tuning with an attention layer. We find that the downstream performance improves when the data has a long-term memory component. These observations support our theory.

**Pretraining data and downstream task.** We generate pretraining data from an HMM with randomly generated transition matrix, emission probabilities, and start distributions. In all experiments, the HMMs have 10 vocabulary symbols, while the hidden state size varies. The downstream task uses input sequences  $X_{1:T}$  of length 129, where the first token  $X_1 = [\text{MASK}]$ . We consider binary classification where labels are generated using linear functions of the analytically-computed posteriors in the HMMs. In all experiments, the ground truth linear weight is sparse with 6 nonzero entries at uniformly random locations with Gaussian values. More details are in Appendix E.

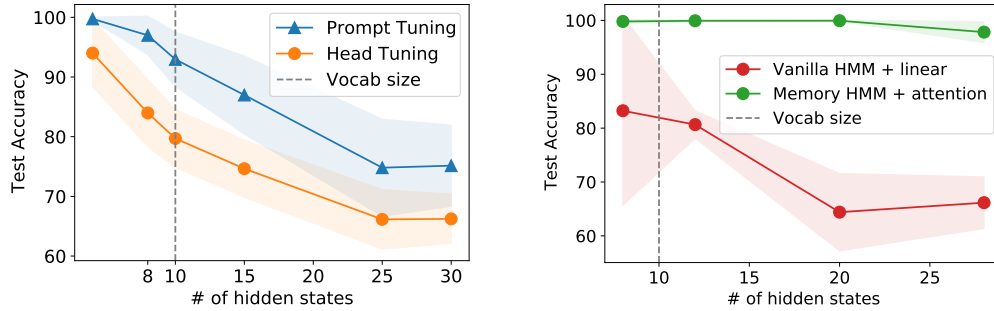

Figure 3: **Left:** Head vs. prompt tuning with a linear head on synthetically-generated HMM data, with varying hidden state sizes. Prompt tuning improves downstream accuracy especially when the problem is degenerate ( $|\mathcal{H}| > |\mathcal{X}|$ ). **Right:** Downstream accuracy of head tuning on data from vanilla HMM vs. memory-augmented HMM, across varying values of  $|\mathcal{M}||\mathcal{H}|$ . Long-term dependencies in the memory-augmented HMM data improve downstream recovery with attention. We average over 20 trials (left) and 5 trials (right) of pretraining and finetuning, with 95% intervals shown.

**Head vs. prompt tuning.** We compare head and prompt tuning as the hidden state size of the HMM varies. The downstream label is computed via  $\mu^\top P[H_1 | X_{-1} = x_{-1}]$ , where  $\mu$  is a random ground-truth linear weight. Head tuning learns a linear head on top of the softmax probabilities predicted by the pretrained model for filling in the first [MASK] token. Prompt tuning uses the same setup but also optimizes a length 20 continuous embedding prepended to the input sequence.

Figure 3 (left) shows that prompt tuning improves downstream performance substantially across all hidden state sizes ( $\{4, 8, 10, 15, 25, 30\}$ ). Prompt tuning improves especially when the hidden state size increases beyond the vocabulary size, which makes the recovery problem degenerate. Thus, as suggested by Theorem 3.6, prompt tuning helps relax the non-degeneracy conditions.

**Memory-augmented HMMs.** We investigate the effect of augmenting the data-generating HMM with a long-term memory. We consider the single memory case with  $|\mathcal{H}| = 4$  and varying memory sizes  $|\mathcal{M}| \in \{2, 3, 5, 7\}$ . The downstream label is generated by computing  $\mu^\top P[M | X_{-1} = x_{-1}]$ , where  $\mu$  denotes the ground-truth weights. Viewing the memory HMM as a HMM where the component on  $\mathcal{M}$  never changes, we can compare against the vanilla HMMs from the previous setting. For the memory-augmented HMM, we use head tuning with a single-cell attention layer on the entire sequence of softmax probability outputs. For the vanilla HMM in the comparison, we use a linear head on the output at the first position, as an attention head would perform worse since the downstream task depends only on  $H_1$  and not any other timesteps.

Figure 3 (right) verifies that head tuning recovers the downstream task better when there is more structure in the data, as predicted by Theorem 4.3. Head tuning achieves near 100% downstream accuracy on all hidden state sizes.

## 6 Conclusion

We analyze how pretraining on generic language modeling tasks can improve performance on diverse downstream tasks. In our analysis framework, the downstream task requires predicting properties of the posterior distribution over latent variables in an underlying generative model. When the generative model is a standard HMM, downstream recovery is possible with a simple classification head under strong non-degeneracy assumptions. We also show that we can relax the non-degeneracy conditions by changing the generative model to a memory-augmented HMM or using prompt tuning. The distributions studied here are meant to provide a first-cut result – we also expect similar theorems to hold for other generative models, which we leave as an interesting direction for future work.

## Acknowledgements

We thank Percy Liang, Tianyi Zhang, and Nelson Liu for helpful discussions.

## Funding statement

CW was supported by a NSF Graduate Research Fellowship. SMX was supported by a NDSEG Fellowship. TM acknowledges support of Google Faculty Award, NSF IIS 2045685, and JD.com. Additional revenue: CW received an honorarium for a talk at G-Research.

## References

- [1] Sanjeev Arora, Hrishikesh Khandeparkar, Mikhail Khodak, Orestis Plevrakis, and Nikunj Saunshi. A theoretical analysis of contrastive unsupervised representation learning. In *International Conference on Machine Learning*, 2019.
- [2] Xiang Chen, Xin Xie, Ningyu Zhang, Jiahuan Yan, Shumin Deng, Chuanqi Tan, Fei Huang, Luo Si, and Huajun Chen. Adaprompt: Adaptive prompt-based finetuning for relation extraction. *arXiv preprint arXiv:2104.07650*, 2021.
- [3] Justin T Chiu and Alexander M Rush. Scaling hidden markov language models. *arXiv preprint arXiv:2011.04640*, 2020.
- [4] Jacob Devlin, Ming-Wei Chang, Kenton Lee, and Kristina Toutanova. Bert: Pre-training of deep bidirectional transformers for language understanding. *arXiv preprint arXiv:1810.04805*, 2018.
- [5] Kawin Ethayarajh. How contextual are contextualized word representations? comparing the geometry of bert, elmo, and gpt-2 embeddings. *arXiv preprint arXiv:1909.00512*, 2019.
- [6] Tianyu Gao, Adam Fisch, and Danqi Chen. Making pre-trained language models better few-shot learners. *arXiv preprint arXiv:2012.15723*, 2020.
- [7] Mario Giulianelli, Jack Harding, Florian Mohnert, Dieuwke Hupkes, and Willem Zuidema. Under the hood: Using diagnostic classifiers to investigate and improve how language models track agreement information. *arXiv preprint arXiv:1808.08079*, 2018.
- [8] Amit Gruber, Yair Weiss, and Michal Rosen-Zvi. Hidden topic markov models. In *Artificial intelligence and statistics*, pages 163–170. PMLR, 2007.
- [9] Karen Hambardzumyan, Hrant Khachatrian, and Jonathan May. Warp: Word-level adversarial reprogramming. *arXiv preprint arXiv:2101.00121*, 2021.
- [10] Jeff Z. HaoChen, Colin Wei, Adrien Gaidon, and Tengyu Ma. Provable guarantees for self-supervised deep learning with spectral contrastive loss, 2021.
- [11] John Hewitt and Christopher D Manning. A structural probe for finding syntax in word representations. In *Proceedings of the 2019 Conference of the North American Chapter of the Association for Computational Linguistics: Human Language Technologies, Volume 1 (Long and Short Papers)*, pages 4129–4138, 2019.
- [12] Ganesh Jawahar, Benoît Sagot, and Djamé Seddah. What does bert learn about the structure of language? In *ACL 2019-57th Annual Meeting of the Association for Computational Linguistics*, 2019.
- [13] Zhengbao Jiang, Frank F Xu, Jun Araki, and Graham Neubig. How can we know what language models know? *Transactions of the Association for Computational Linguistics*, 8:423–438, 2020.
- [14] Mandar Joshi, Danqi Chen, Yinhan Liu, Daniel S Weld, Luke Zettlemoyer, and Omer Levy. Spanbert: Improving pre-training by representing and predicting spans. *Transactions of the Association for Computational Linguistics*, 8:64–77, 2020.
- [15] Taeuk Kim, Jihun Choi, Daniel Edmiston, and Sang-goo Lee. Are pre-trained language models aware of phrases? simple but strong baselines for grammar induction. *arXiv preprint arXiv:2002.00737*, 2020.

- [16] Daphne Koller and Nir Friedman. *Probabilistic graphical models: principles and techniques*. MIT press, 2009.
- [17] Julian Kupiec. Robust part-of-speech tagging using a hidden markov model. *Computer speech & language*, 6(3):225–242, 1992.
- [18] Jason D Lee, Qi Lei, Nikunj Saunshi, and Jiacheng Zhuo. Predicting what you already know helps: Provable self-supervised learning. *arXiv preprint arXiv:2008.01064*, 2020.
- [19] Brian Lester, Rami Al-Rfou, and Noah Constant. The power of scale for parameter-efficient prompt tuning. *arXiv preprint arXiv:2104.08691*, 2021.
- [20] Yoav Levine, Barak Lenz, Opher Lieber, Omri Abend, Kevin Leyton-Brown, Moshe Tennenholtz, and Yoav Shoham. Pmi-masking: Principled masking of correlated spans. *arXiv preprint arXiv:2010.01825*, 2020.
- [21] Xiang Lisa Li and Percy Liang. Prefix-tuning: Optimizing continuous prompts for generation. *arXiv*, 2021.
- [22] Matthew E Peters, Mark Neumann, Mohit Iyyer, Matt Gardner, Christopher Clark, Kenton Lee, and Luke Zettlemoyer. Deep contextualized word representations. *arXiv preprint arXiv:1802.05365*, 2018.
- [23] Guanghai Qin and Jason Eisner. Learning how to ask: Querying lms with mixtures of soft prompts. *arXiv preprint arXiv:2104.06599*, 2021.
- [24] Lawrence Rabiner and Biinghwang Juang. An introduction to hidden markov models. *ieee assp magazine*, 3(1):4–16, 1986.
- [25] Alec Radford, Karthik Narasimhan, Tim Salimans, and Ilya Sutskever. Improving language understanding by generative pre-training. 2018.
- [26] Colin Raffel, Noam Shazeer, Adam Roberts, Katherine Lee, Sharan Narang, Michael Matena, Yanqi Zhou, Wei Li, and Peter J Liu. Exploring the limits of transfer learning with a unified text-to-text transformer. *arXiv preprint arXiv:1910.10683*, 2019.
- [27] Anna Rogers, Olga Kovaleva, and Anna Rumshisky. A primer in bertology: What we know about how bert works. *Transactions of the Association for Computational Linguistics*, 8: 842–866, 2020.
- [28] Nikunj Saunshi, Sadhika Malladi, and Sanjeev Arora. A mathematical exploration of why language models help solve downstream tasks. *arXiv preprint arXiv:2010.03648*, 2020.
- [29] Timo Schick and Hinrich Schütze. Exploiting cloze questions for few shot text classification and natural language inference. *arXiv preprint arXiv:2001.07676*, 2020.
- [30] Timo Schick and Hinrich Schütze. It’s not just size that matters: Small language models are also few-shot learners. *arXiv preprint arXiv:2009.07118*, 2020.
- [31] Taylor Shin, Yasaman Razeghi, Robert L Logan IV, Eric Wallace, and Sameer Singh. Auto-prompt: Eliciting knowledge from language models with automatically generated prompts. *arXiv preprint arXiv:2010.15980*, 2020.
- [32] Koustuv Sinha, Robin Jia, Dieuwke Hupkes, Joelle Pineau, Adina Williams, and Douwe Kiela. Masked language modeling and the distributional hypothesis: Order word matters pre-training for little. *arXiv preprint arXiv:2104.06644*, 2021.
- [33] Sainbayar Sukhbaatar, Arthur Szlam, Jason Weston, and Rob Fergus. End-to-end memory networks. *arXiv preprint arXiv:1503.08895*, 2015.
- [34] Ian Tenney, Dipanjan Das, and Ellie Pavlick. Bert rediscovers the classical nlp pipeline. *arXiv preprint arXiv:1905.05950*, 2019.

- [35] Ian Tenney, Patrick Xia, Berlin Chen, Alex Wang, Adam Poliak, R Thomas McCoy, Najoung Kim, Benjamin Van Durme, Samuel R Bowman, Dipanjan Das, et al. What do you learn from context? probing for sentence structure in contextualized word representations. *arXiv preprint arXiv:1905.06316*, 2019.
- [36] Christopher Tosh, Akshay Krishnamurthy, and Daniel Hsu. Contrastive estimation reveals topic posterior information to linear models. *arXiv:2003.02234*, 2020.
- [37] Christopher Tosh, Akshay Krishnamurthy, and Daniel Hsu. Contrastive learning, multi-view redundancy, and linear models. In *Algorithmic Learning Theory*, pages 1179–1206. PMLR, 2021.
- [38] Colin Wei, Kendrick Shen, Yining Chen, and Tengyu Ma. Theoretical analysis of self-training with deep networks on unlabeled data, 2020. URL <https://openreview.net/forum?id=rC8sJ4i6kaH>.
- [39] Jason Weston, Sumit Chopra, and Antoine Bordes. Memory networks. *arXiv preprint arXiv:1410.3916*, 2014.
- [40] Tianyi Zhang and Tatsunori Hashimoto. On the inductive bias of masked language modeling: From statistical to syntactic dependencies. *arXiv preprint arXiv:2104.05694*, 2021.
- [41] Zexuan Zhong, Dan Friedman, and Danqi Chen. Factual probing is [mask]: Learning vs. learning to recall. *arXiv preprint arXiv:2104.05240*, 2021.

## Checklist

1. For all authors...
  - (a) Do the main claims made in the abstract and introduction accurately reflect the paper’s contributions and scope? [Yes]
  - (b) Did you describe the limitations of your work? [Yes] See Section A.
  - (c) Did you discuss any potential negative societal impacts of your work? [Yes] See Section A.
  - (d) Have you read the ethics review guidelines and ensured that your paper conforms to them? [Yes]
2. If you are including theoretical results...
  - (a) Did you state the full set of assumptions of all theoretical results? [Yes]
  - (b) Did you include complete proofs of all theoretical results? [Yes]
3. If you ran experiments...
  - (a) Did you include the code, data, and instructions needed to reproduce the main experimental results (either in the supplemental material or as a URL)? [Yes] See supplemental material.
  - (b) Did you specify all the training details (e.g., data splits, hyperparameters, how they were chosen)? [Yes] See Section E.
  - (c) Did you report error bars (e.g., with respect to the random seed after running experiments multiple times)? [Yes] See Figure 3.
  - (d) Did you include the total amount of compute and the type of resources used (e.g., type of GPUs, internal cluster, or cloud provider)? [Yes] See Section E.
4. If you are using existing assets (e.g., code, data, models) or curating/releasing new assets...
  - (a) If your work uses existing assets, did you cite the creators? [Yes]
  - (b) Did you mention the license of the assets? [N/A]
  - (c) Did you include any new assets either in the supplemental material or as a URL? [N/A]
  - (d) Did you discuss whether and how consent was obtained from people whose data you’re using/curating? [N/A]
  - (e) Did you discuss whether the data you are using/curating contains personally identifiable information or offensive content? [N/A]
5. If you used crowdsourcing or conducted research with human subjects...
  - (a) Did you include the full text of instructions given to participants and screenshots, if applicable? [N/A]
  - (b) Did you describe any potential participant risks, with links to Institutional Review Board (IRB) approvals, if applicable? [N/A]
  - (c) Did you include the estimated hourly wage paid to participants and the total amount spent on participant compensation? [N/A]

## A Limitations and societal impact

**Limitations.** The primary limitation of our work is that the analysis for prompt tuning has to be performed in an idealized setting where we assume the model processes the token embeddings in a very specific way, i.e., it treats the token embeddings as a vector describing token emission probabilities and performs message passing. Without making this assumption, it’s extremely challenging to analyze the embeddings of the model directly, as this would require opening up the black box of the model. It seems unlikely that models pretrained in practice will entirely fit the assumptions we require for our prompt tuning analysis. However, we hope that our analysis can still provide insights into why prompt tuning might help, even with the assumptions it requires.

Another limitation is that our results assume the model outputs the perfect conditional token probabilities, but in practice we likely run into issues like model misspecification and suboptimal training. We believe it’s possible for future work to use existing techniques to provide guarantees which account

for errors in the probabilities predicted by the model. We decided to omit such analyses in order to obtain a cleaner first result.

**Negative societal impact.** We don't foresee any negative impact of work, as our paper is theoretical and does not propose new algorithms.

## B Proofs for Section 3

We provide the formal proof of Theorem 3.3 based on the sketch in Section 3. The following lemma will be useful in our analysis.

**Claim B.1.** *In the setting of Section 3, suppose that Assumption 3.2 holds. Fix any timestep  $i \geq 1$ . Then there exists a diagonal matrix  $D$  such that for all  $x \in \text{supp}(P[X])$ ,*

$$P[H_i | X_{i+1:T+i} = x] = r_x D P[H_0 | X_{1:T} = x]$$

where  $r_x > 0$  is a positive scalar.

*Proof.* First, we note that by Assumption 3.2,  $P[H_i]$  has full support. As a consequence,  $\Pr(X_{i+1:t+i} = x) > 0$ . By Bayes' rule,

$$\begin{aligned} P[H_i | X_{i+1:T+i} = x] &= \frac{P[X_{i+1:T+i} = x | H_i] \odot P[H_i]}{\Pr(X_{i+1:T+i} = x)} \\ &= \frac{P[X_{1:T} = x | H_0] \odot P[H_0]}{\Pr(X_{i+1:T+i} = x)} \odot \frac{P[H_i]}{P[H_0]} \\ &\quad \text{(by Markovian property of HMMs)} \\ &= P[H_0 | X_{1:T} = x] \odot \frac{P[H_i]}{P[H_0]} \cdot \frac{\Pr(X_{1:T} = x)}{\Pr(X_{i+1:T+i} = x)} \end{aligned}$$

Note that the vector  $\frac{P[H_i]}{P[H_0]}$  has finite and positive entries. The same applies to the ratio  $r_x \triangleq \frac{\Pr(X_{1:T} = x)}{\Pr(X_{i+1:T+i} = x)}$ . Thus, we get the desired statement.  $\square$

The proof of Theorem 3.3 follows below.

*Proof of Theorem 3.3.* By definition,  $G_1(x') = P[X_1 | X_{2:T+1} = x]$ . Therefore, our goal is to rewrite  $P[H_0 | X_{1:T} = x]$  as a linear function of  $P[X_1 | X_{2:T+1} = x]$  (up to a scaling which won't affect the linear head prediction). Concretely, we will show

$$P[H_0 | X_{1:T} = x] = r_x B P[X_1 | X_{2:T+1} = x] \tag{B.1}$$

for a scalar  $r_x \geq 0$ . With this equation, taking  $b = \mu^\top B$  will give the desired result.

First, observe that  $P[X_1 | X_{2:T+1} = x] = W P[H_1 | X_{2:T+1} = x]$  by Proposition 3.4. Next, we apply Claim B.1 to obtain an invertible matrix  $D$  such that for all  $x \in \text{supp}(P[X])$ ,  $P[H_1 | X_{2:T+1} = x] = r_x D P[H_0 | X_{1:T} = x]$ , where  $r_x > 0$  is a scalar.

If  $W$  has full row rank, it has a left inverse  $W^\dagger$  with  $W^\dagger W = I_{|\mathcal{H}| \times |\mathcal{H}|}$ . Choosing  $b = \mu D^{-1} W^\dagger$ , we obtain

$$\begin{aligned} \mathbb{1}(b^\top G_1(x') \geq 0) &= \mathbb{1}(\mu^\top D^{-1} W^\dagger W P[H_1 | X_{2:T+1} = x] \geq 0) \\ &= \mathbb{1}(\mu^\top P[H_0 | X_{1:T} = x] \geq 0) = F^*(x) \end{aligned}$$

$\square$

Next, we complete the proof of Proposition 3.4.

*Proof of Proposition 3.4.* We write

$$\begin{aligned}
P[U | V = v] &= \sum_z P[U, Z = z | V = v] \\
&= \sum_z P[U | Z = z, V = v] \Pr(Z = z | V = v) && \text{(by Bayes' rule)} \\
&= \sum_z P[U | Z = z] \Pr(Z = z | V = v) && \text{(since } U \perp V | Z) \\
&= P[U | Z] P[Z | V = v]
\end{aligned}$$

□

## C Formal abstraction for prompt tuning and proofs for Section 3.1

We first formalize the definition of the model  $\overline{G}$  described in Section 3.1. The model  $\overline{G}$  takes a sequence of embedding vectors  $v = (v_1, \dots, v_t)$  as input and implements message passing to compute a sequence of  $t$  outputs. We first define left and right messages  $\overleftarrow{\delta}_{i+1 \rightarrow i}(v)$  and  $\overrightarrow{\delta}_{i-1 \rightarrow i}(v)$  for  $i \in [t]$ , as follows:

$$\begin{aligned}
\overleftarrow{\delta}_{t+1 \rightarrow t}(e) &= P[H_t] \\
\overleftarrow{\delta}_{i \rightarrow i-1}(e) &= P[H_{i-1} | H_i] (\overleftarrow{\delta}_{i+1 \rightarrow i}(v) \odot v_i) \quad \forall 1 < i < t \\
\overrightarrow{\delta}_{0 \rightarrow 1}(e) &= P[H_1] \\
\overrightarrow{\delta}_{i \rightarrow i+1}(e) &= P[H_{i+1} | H_i] (\overrightarrow{\delta}_{i-1 \rightarrow i}(v) \odot v_i) \quad \forall 1 < i < t
\end{aligned}$$

Next, we define the aggregated message at timestep  $i$  by

$$\tau_i(v) \triangleq \begin{cases} \overleftarrow{\delta}_{2 \rightarrow 1}(v) & \text{if } i = 1 \\ \frac{\overleftarrow{\delta}_{i+1 \rightarrow i}(v) \odot \overrightarrow{\delta}_{i-1 \rightarrow i}(v)}{P[H_i]} & \text{if } 1 < i < t \\ \overrightarrow{\delta}_{t-1 \rightarrow t}(v) & \text{if } i = t \end{cases} \quad (\text{C.1})$$

Note that if Assumption 3.2 holds about the Markov chain  $H_0, H_1, \dots$ ,  $\tau_i(v)$  is always well-defined because  $P[H_i]$  will have full support. Note that for the proper embeddings  $e(x_i) = P[X_i = x_i | H_i]$ , where for  $x = (x_1, \dots, x_t)$ , we use  $e(x) = (e(x_1), \dots, e(x_t))$ , we can check via classical results on message passing [16] that

$$\tau_i(e(x)) = P[H_i, X_{-i} = x_{-i}]$$

Finally, we let the model model  $\overline{G}$  compute

$$\overline{G}_i(v) = W \frac{\tau_i(v)}{\|\tau_i(v)\|_1}$$

There is an edge case where the demoninator is 0, i.e.  $\|\tau_i(v)\|_1 = 0$ . To make the behavior of  $\overline{G}$  well-defined, in this case we set  $\overline{G}_i(v) = \mathbf{0}_{|\mathcal{X}|}$ . We observe that if the input embedding are obtained by  $e(x)$ ,  $\overline{G}_i(v)$  indeed computes the desired conditional probability vector for  $x \in \text{supp}(P[X])$ :

$$\overline{G}_i(e(x)) = P[X_i | X_{-i} = x_{-i}]$$

### C.1 Proof of Theorem 3.6

First we formalize the observation that soft prompt tuning is equivalent to adding a fake token  $\tilde{z}$  to the vocabulary with emission probabilities at timestep 1 given by  $u$ , and letting  $\overline{G}$  compute conditional probabilities for this new distribution over sequences.

**Lemma C.1.** *In the setting of Theorem 3.6, fix any prompt vector  $u \in [0, 1]^{|H|}$ . Define the random variable  $\hat{X}$  with the same emission probabilities as  $X$  for  $i > 1$ :  $P[\hat{X}_i | H_i] = P[X_i | H_i]$ . For timestep 1, we define the emission probabilities of  $\hat{X}_1$  as follows:*

$$\begin{aligned}
P[\hat{X}_1 = \tilde{z} | H_1] &= u \\
P[\hat{X}_1 = z | H_1] &= (1 - u) \odot P[X_1 = z | H_1] \quad \forall z \in \mathcal{X}
\end{aligned}$$



In the above equations,  $\tilde{z}$  is a fake token added to the vocabulary at timestep 1. It follows that for any  $i$ , defining  $\tau_i$  as in (C.1)

$$\tau_i(\hat{e}(x)) = P[H_i, \hat{X}_{-i} = (\tilde{z}, \emptyset, x)_{-i}] \quad (\text{C.2})$$

As a consequence, it follows that for  $i > 1$  and any  $x$  such that  $(\tilde{z}, \emptyset, x)_{-i} \in \text{supp}(P[\hat{X}_{-i}])$ ,

$$\bar{G}_i(\hat{e}(x)) = P[\hat{X}_i | \hat{X}_{-i} = (\tilde{z}, \emptyset, x)_{-i}] = WP[H_i | \hat{X}_{-i} = (\tilde{z}, \emptyset, x)_{-i}]$$

For any  $x$  with  $(\tilde{z}, \emptyset, x)_{-i} \notin \text{supp}(P[\hat{X}_{-i}])$ ,  $\bar{G}_i(\hat{e}(x)) = \mathbf{0}$ .

Next, the following lemma disentangles the influences of the fake token  $\tilde{z}$  and the input sequence on the posterior distribution of the hidden variable.

**Lemma C.2.** *In the setting above, there exists an invertible diagonal matrix  $D$  such that for all  $x$  such that  $(\tilde{z}, x) \in \text{supp}(P[\hat{X}_{-2}])$ , the following equation holds:*

$$P[H_2 | \hat{X}_1 = \tilde{z}, \hat{X}_{3:T+2} = x] = r_x D (P[\hat{X}_1 = \tilde{z}, H_2] \odot P[H_0 | X_{1:T} = x])$$

Here  $r_x > 0$  is a positive scalar.

We now complete the proof of Theorem 3.6.

*Proof of Theorem 3.6.* Let  $\mathcal{B}$  be the set defined in Assumption 3.5 and define  $u$  such that  $u_h = 1$  if  $h \in \mathcal{B}$  and  $u_h = 0$  otherwise. First, we restrict our focus to  $x$  such that  $(\tilde{z}, x) \in \text{supp}(P[\hat{X}_{-2}])$ . For these  $x$ , we can apply Lemma C.1 and Lemma C.2 in the manner described in the proof sketch. This gives  $\bar{G}_2(\hat{e}(x)) = r_x W D v$  for  $v \triangleq (A(u \odot P[H_1])) \odot P[H_0 | X_{1:T} = x]$ . By definition of  $\mathcal{B}$ , we have  $\text{supp}(A(u \odot P[H_1])) = \mathcal{H}^*$ , so  $\text{supp}(Dv) \subseteq \mathcal{H}^*$ . Thus, there is a matrix  $\widehat{W}^\dagger$  such that

$$\widehat{W}^\dagger \bar{G}_2(\hat{e}(x)) = r_x \widehat{W}^\dagger W D v = r_x W D v$$

The existence of  $\widehat{W}^\dagger$  is due to the fact that  $\{W_{:,h}\}_{h \in \mathcal{H}^*}$  is a linearly independent set of vectors, and  $\text{supp}(Dv) \subseteq \mathcal{H}^*$  whenever  $x$  satisfies  $(\tilde{z}, x) \in \text{supp}(P[\hat{X}_{-2}])$ . Next, we note that a matrix  $B$  exists such that  $(BDv)_h = \Pr(H_0 = h | X_{1:T} = x)$  for  $h \in \mathcal{H}^*$  and  $(BDv)_h = 0$  otherwise. This is because  $D$  is invertible, and  $\text{supp}(A(u \odot P[H_1])) = \mathcal{H}^*$ , so we can recover  $P[H_0 | X_{1:T} = x]$  on coordinates in  $\mathcal{H}^*$  by applying another coordinate-wise scaling. It follows that we can set  $b = \mu^\top B \widehat{W}^\dagger$ . With this choice of  $b$ , we compute

$$b^\top \bar{G}_2(\hat{e}(x)) = r_x \mu^\top B D v = r_x \sum_{h \in \mathcal{H}^*} \mu_h \Pr(H_0 = h | X_{1:T} = x) = r_x \mu^\top P[H_0 | X_{1:T} = x]$$

where the last equality follows because  $\text{supp}(\mu) \subseteq \mathcal{H}^*$ . This completes the case where  $(\tilde{z}, x) \in \text{supp}(P[\hat{X}_{-2}])$ .

Otherwise, for  $(\tilde{z}, x) \notin \text{supp}(P[\hat{X}_{-2}])$ , by the behavior of  $\bar{G}$  in Lemma C.1,  $\bar{G}_2(\hat{e}(x)) = \mathbf{0}$ , so any linear head must output  $b^\top \bar{G}_2(\hat{e}(x)) = \mathbf{0}$ . Furthermore, by the conditional independence structure in  $\hat{X}$ , we must also have  $\text{supp}(P[H_2, \hat{X}_1 = \tilde{z}]) \cap \text{supp}(P[H_2, \hat{X}_{3:T+2} = x]) = \emptyset$ . As  $\text{supp}(\mu) \subseteq \text{supp}(P[H_2, \hat{X}_1 = \tilde{z}])$ , this must also mean  $\text{supp}(\mu) \cap \text{supp}(P[H_2, \hat{X}_{3:T+2} = x]) = \emptyset$ . However, we also have  $P[H_2, \hat{X}_{3:T+2} = x] = P[H_2, X_{3:T+2} = x]$  by the definition of  $\hat{X}$ , and this must have the same support as  $P[H_0 | X_{1:T} = x]$  by applying Claim B.1 and the fact that  $x \in \text{supp}(P[X])$ . It follows that for this choice of  $x$ ,  $\mu^\top P[H_0 | X_{1:T} = x] = 0$ , so the desired statement still stands.  $\square$

We fill in the proofs of the lemmas below.

*Proof of Lemma C.1.* First, we note that (C.2) follows directly from the derivation of  $\tau$ , and well-known results about message passing [16]. Next, it suffices to consider the case where  $(\tilde{z}, \emptyset, x)_{-i} \notin \text{supp}(P[\hat{X}_{-i}])$ , as the other case follows directly from the definition of  $\bar{G}$  in terms of  $\tau$ . In this case, we observe that  $\tau_i(\hat{e}(x)) = P[H_i, \hat{X}_{-i} = (\tilde{z}, \emptyset, x)_{-i}] = \mathbf{0}$ . It follows that  $\|\tau_i(\hat{e}(x))\|_1 = 0$ . Thus, from our definition of  $\bar{G}$ , we must have  $\bar{G}_i(\hat{e}(x)) = \mathbf{0}$ .  $\square$

*Proof of Lemma C.2.* By the conditional independence relations in a HMM,  $\widehat{X}_1 \perp \widehat{X}_{3:T+2} | H_2$ . Using Bayes' rule, we obtain

$$\begin{aligned}
P[H_2 | \widehat{X}_1 = \tilde{z}, \widehat{X}_{3:T+2} = x] &= \frac{P[\widehat{X}_1 = \tilde{z}, \widehat{X}_{3:T+2} = x | H_2] \odot P[H_2]}{\Pr(\widehat{X}_1 = \tilde{z}, \widehat{X}_{3:T+2} = x)} \\
&= \frac{P[\widehat{X}_1 = \tilde{z} | H_2] \odot P[\widehat{X}_{3:T+2} = x | H_2] \odot P[H_2]}{\Pr(\widehat{X}_1 = \tilde{z}, \widehat{X}_{3:T+2} = x)} \\
&\quad \text{(by conditional independence)} \\
&= \frac{P[\widehat{X}_1 = \tilde{z} | H_2] \odot P[X_{1:T} = x | H_0] \odot P[H_2]}{\Pr(\widehat{X}_1 = \tilde{z}, \widehat{X}_{3:T+2} = x)} \\
&\quad \text{(by definition of } \widehat{X} \text{ and the Markovian property)} \\
&= r_x P[\widehat{X}_1 = \tilde{z}, H_2] \odot P[H_0 | X_{1:T} = x] \odot \frac{\mathbf{1}}{P[H_0]}
\end{aligned}$$

Where we define  $r_x \triangleq \frac{\Pr(X_{1:T}=x)}{\Pr(\widehat{X}_1=\tilde{z}, \widehat{X}_{3:T+2}=x)}$ . We note that  $r_x$  is positive and well-defined by the conditions of the lemma and Theorem 3.6. We can set  $D$  to be the matrix  $\text{diag}(\frac{\mathbf{1}}{P[H_0]})$ , which has finite positive entries on the diagonal by Assumption 3.2.  $\square$

## D Proofs for Section 4

First, we introduce a proposition which is generally useful for proving the theorems in Section 4.

**Proposition D.1.** *In the setting of Section 4, it holds that*

$$P[X_i | X_{-i} = x_{-i}] = P[X_i | M_{J_i}, J_i, S_i] P[M_{J_i}, J_i, S_i, X_{-i} = x_{-i}]$$

*Equivalently, we have the expansion*

$$P[X_i | X_{-i} = x_{-i}] = \sum_{h=(j,s)} \sum_m W_{\cdot, (m,j,s)} \Pr(M_j = m, H_i = h | X_{-i} = x_{-i}) \quad (\text{D.1})$$

*Proof.* An alternative interpretation of this statement is that  $X_i$  is conditionally independent from everything else given  $M_{J_i}, J_i, S_i$ . However, we will prove this statement algebraically. We compute

$$\begin{aligned}
&P[X_i | X_{-i} = x_{-i}] = \\
&\sum_{h=(j,s)} \sum_{m_j} \sum_{m_{-j}} P[X_i | M_{-j} = m_{-j}, M_j = m_j, H_i = h] \Pr(M_{-j} = m_{-j}, M_j = m_j, H_i = h | X_{-i} = x_{-i}) \\
&= \sum_{h=(j,s)} \sum_{m_j} \sum_{m_{-j}} W_{\cdot, (m_j, j, s)} \Pr(M_{-j} = m_{-j}, M_j = m_j, H_i = h | X_{-i} = x_{-i}) \\
&= \sum_{h=(j,s)} \sum_{m_j} W_{\cdot, (m_j, j, s)} \Pr(M_j = m_j, H_i = h | X_{-i} = x_{-i})
\end{aligned}$$

$\square$

### D.1 Proof of Theorem 4.3

Throughout this section, we use  $M_{J_i}$  to denote the random variable obtained by indexing  $M$  by  $J_i$ , both of which are themselves random variables. Let  $\widehat{\mathcal{I}}$  denote the set of indices  $i$  where  $\text{supp}(P[J_i | X_{-i} = x_{-i}]) = \{j^*\}$  and  $\text{supp}(P[S_i | X_{-i} = x_{-i}]) \subseteq \mathcal{S}^*$ . We will first construct the key function  $K$  and query  $q$  such that the set of  $\mathcal{I}$  of attended-to positions (4.2) is precisely  $\widehat{\mathcal{I}}$ . This construction does not require the position embeddings  $\beta_1, \dots, \beta_t$ , so we set them to  $\mathbf{0}$ .

The following lemma demonstrates the existence of  $K$  and  $q$  such that  $\mathcal{I} = \widehat{\mathcal{I}}$ .

**Lemma D.2.** *In the setting of Theorem 4.3, define  $\widehat{\mathcal{I}} \triangleq \{i : \text{supp}(P[J_i | X_{-i} = x_{-i}]) = \{j^*\} \text{ and } \text{supp}(P[S_i | X_{-i} = x_{-i}]) \subseteq \mathcal{S}^*\}$ . Then there exist query  $q \in \mathbb{R}^{|\mathcal{H}|}$  and key  $K$  parameterized by  $\Theta^{(K)} \in \mathbb{R}^{|\mathcal{H}| \times |\mathcal{X}|}$ , such that when  $x \in \text{supp}(P[X])$  and  $\widehat{\mathcal{I}}$  is nonempty, the set  $\mathcal{I}$  of attended-to positions satisfies  $\mathcal{I} = \widehat{\mathcal{I}}$ .*

The proof of Lemma D.2 requires the following claim.

**Claim D.3.** *In the setting of Theorem 4.3, there is a matrix  $\Theta^{(1)} \in \mathbb{R}^{|\mathcal{H}| \times |\mathcal{X}|}$  such that for all  $x \in \text{supp}(P[X])$  and  $s \in \mathcal{S}^*$ ,  $(\Theta^{(1)} G_i(x))_{(j^*, s)} = P[H_i = (j^*, s) | X_{-i} = x_{-i}]$ . Furthermore,  $\|\Theta^{(1)} G_i(x)\|_1 = 1$ . In addition, for  $s \in \mathcal{S}^*$ , there exists  $\Theta^{(2, s)} \in \mathbb{R}^{|\mathcal{M}| \times |\mathcal{X}|}$  such that for all  $x \in \text{supp}(P[X])$ ,*

$$\Theta^{(2, s)} G_i(x) = P[M_{j^*}, H_i = (j^*, s) | X_{-i} = x_{-i}]$$

*Proof.* We have, by Proposition D.1,

$$\begin{aligned} G_i(x) &= P[X_i | X_{-i} = x_{-i}] \\ &= \sum_{h=(j, s)} \left( \sum_m W_{:, (m, j, s)} \Pr(M_j = m, H_i = h | X_{-i} = x_{-i}) \right) \\ &= \sum_{h=(j, s)} \nu^{(h)} \end{aligned}$$

In the last equality, we defined  $\nu^{(h)}$  to be the expression in the parentheses. Note that  $\nu^{(h)} \in \mathcal{V}^{(h)} \triangleq \text{span}(\{W_{:, (m, h)}\}_{m \in \mathcal{M}})$ . Furthermore, for  $h \notin \mathcal{H}^*$ ,  $\nu^{(h)} \in \bar{\mathcal{V}} \triangleq \text{span}(\{W_{:, (m, h)}\}_{m \in \mathcal{M}, h \in \mathcal{H} \setminus \mathcal{H}^*})$ . As the spans  $(\mathcal{V}^{(h)})_{h \in \mathcal{H}^*}$  and  $\bar{\mathcal{V}}$  are all pairwise disjoint, by Assumption 4.2, for each  $h \in \mathcal{H}^*$ , we can recover

$$\nu^{(h)} = B^{(h)} P[X_i | X_{-i} = x_{-i}]$$

Likewise, we can obtain

$$\sum_{h \notin \mathcal{H}^*} \nu^{(h)} = \bar{B} P[X_i | X_{-i} = x_{-i}]$$

Now we have, for  $h \in \mathcal{H}^*$ ,

$$\begin{aligned} \mathbf{1}^\top \nu^{(h)} &= \sum_m \mathbf{1}^\top W_{:, (m, h)} \Pr(M_j = m, H_i = h | X_{-i} = x_{-i}) \\ &= \sum_m \Pr(M_j = m, H_i = h | X_{-i} = x_{-i}) \quad (\text{because } \mathbf{1}^\top W_{:, (m, h)} = 1) \\ &= \Pr(H_i = h | X_{-i} = x_{-i}) \end{aligned}$$

Likewise, the same reasoning gives  $\mathbf{1}^\top \sum_{h \notin \mathcal{H}^*} \nu^{(h)} = \sum_{h \notin \mathcal{H}^*} \Pr(H_i = h | X_{-i} = x_{-i})$ . Thus, we can choose  $\Theta^{(1)}$  to be the matrix with rows  $\Theta_{h, :}^{(1)} = \mathbf{1}^\top B^{(h)}$  when  $h \in \mathcal{H}^*$ , and for some arbitrary  $\bar{h} \notin \mathcal{H}^*$ ,  $\Theta_{\bar{h}, :}^{(1)} = \mathbf{1}^\top \bar{B}$ . We set all other rows to  $\mathbf{0}$ , and we can check that this satisfies the lemma requirements.

We now construct  $\Theta^{(2, h)}$ . We can express  $\nu^{(h)}$  in a vectorized manner by writing

$$\nu^{(h)} = W_{:, (\mathcal{M}, h)} P[M_j, H_i = h | X_{-i} = x_{-i}]$$

where  $W_{:, (\mathcal{M}, h)} \in \mathbb{R}^{|\mathcal{X}| \times |\mathcal{M}|}$  has columns  $\{W_{:, (m, h)}\}_{m \in \mathcal{M}}$ . Note that for  $j = j^*$ ,  $s \in \mathcal{S}^*$ , the non-degeneracy assumptions imply that  $W_{:, (\mathcal{M}, j^*, s)}$  has left inverse  $W_{:, (\mathcal{M}, j^*, s)}^\dagger$ . Thus, we set  $\Theta^{(2, s)} = W_{:, (\mathcal{M}, j^*, s)}^\dagger B^{(j^*, s)}$  to obtain for  $s \in \mathcal{S}^*$ ,

$$\begin{aligned} \Theta^{(2, s)} G_i(x) &= W_{:, (\mathcal{M}, j^*, s)}^\dagger B^{(j^*, s)} P[X_i | X_{-i} = x_{-i}] \\ &= W_{:, (\mathcal{M}, j^*, s)}^\dagger W_{:, (\mathcal{M}, j^*, s)} P[M_{j^*}, H_i = (j^*, s) | X_{-i} = x_{-i}] \\ &= P[M_{j^*}, H_i = (j^*, s) | X_{-i} = x_{-i}] \end{aligned}$$

This gives the desired result.  $\square$

*Proof of Lemma D.2.* We choose the first  $|\mathcal{H}|$  entries of  $q$  such that  $q_h = 1$  if  $h = (j^*, s)$  for  $s \in \mathcal{S}^*$ , and  $q_h = 0$  otherwise. The last entry is 0. Next, we choose  $\Theta^{(K)}$  so that the first  $|\mathcal{H}|$  rows are  $\Theta^{(1)}$ , and the last row is all zeros. where  $\Theta^{(1)}$  is defined in Claim D.3. With this choice of  $\Theta^{(K)}$ ,  $K(G_i(x))_h = \Pr(H_i = h | X_{-i} = x_{-i})$  for  $h \in \mathcal{H}^*$ . Furthermore,  $\|K(G_i(x))\|_1 = 1$ , by Claim D.3.

Now we note that for all  $i$ ,  $1 = \|K(G_i(x))\|_1 \geq q^\top K(G_i(x))$ , and for  $i \in \widehat{\mathcal{I}}$ ,  $q^\top K(G_i(x)) = \sum_{s \in \mathcal{S}^*} \Pr(H_i = (j^*, s) | X_{-i} = x_{-i}) = 1$  by definition of  $q$  and  $\widehat{\mathcal{I}}$ . This implies that positions  $i \in \widehat{\mathcal{I}}$  do indeed achieve the maximum attention scores.  $\square$

Next, we also require a construction of the value function such that it computes the correct prediction for all  $i \in \widehat{\mathcal{I}}$ .

**Lemma D.4.** *In the setting of Theorem 4.3, let  $\widehat{\mathcal{I}}$  be defined as in Lemma D.2. We can choose the parameters of the value function  $V$ ,  $\Theta^{(V)} \in \mathbb{R}^{|\mathcal{M}||\mathcal{H}| \times |\mathcal{X}|}$ ,  $b \in \mathbb{R}^{|\mathcal{M}||\mathcal{H}|}$ , such that when  $x \in \text{supp}(P[X])$  and  $\widehat{\mathcal{I}}$  is nonempty, for all  $i \in \widehat{\mathcal{I}}$ ,*

$$V(G_i(x), e(x_i)) = r_{x,i} \mu^\top P[M_{j^*} | X_{1:T} = x]$$

where  $r_{x,i} > 0$  is a positive scalar.

*Proof.* We first choose  $\Theta^{(V)}$  such that the rows satisfy  $\Theta_{(m,j^*,s),:}^{(V)} = \Theta_{m,:}^{(2,s)}$  when  $s \in \mathcal{S}^*$  for  $\Theta^{(2,s)}$  constructed in Claim D.3, and  $\Theta_{(m,j,s),:}^{(V)} = \mathbf{0}_{|\mathcal{X}|}$  otherwise for  $j \neq j^*$  or  $s \notin \mathcal{S}^*$ .

We claim that for  $i \in \widehat{\mathcal{I}}$ ,

$$\Theta^{(V)} G_i(x) = P[M_{J_i}, J_i, S_i | X_{-i} = x_{-i}] \quad (\text{D.2})$$

This is because for  $s \in \mathcal{S}^*$ ,  $\Theta^{(2,s)} G_i(x) = P[M_{j^*}, H_i = (j^*, s) | X_{-i} = x_{-i}]$  by Claim D.3, and for  $h = (j, s)$  for  $j \neq j^*$  or  $s \notin \mathcal{S}^*$ ,

$$P[M_j, H_i = h | X_{-i} = x_{-i}] = P[M_j | H_i = h, X_{-i} = x_{-i}] \Pr(H_i = h | X_{-i} = x_{-i}) = \mathbf{0}_{|\mathcal{M}|}$$

Note that this last equality followed because  $\Pr(H_i = h | X_{-i} = x_{-i}) = 0$  for the choice of  $h$  and  $i \in \widehat{\mathcal{I}}$ . By construction of  $\Theta^{(V)}$ , these computations imply that (D.2) does indeed hold. The embedding can be chosen such that  $e(x_i) = P[X_i = x_i | M_{J_i}, J_i, S_i]$ . Thus, we have for  $i \in \widehat{\mathcal{I}}$ :

$$\begin{aligned} (\Theta^{(V)} G_i(x)) \odot e(x_i) &= P[M_{J_i}, J_i, S_i | X_{-i} = x_{-i}] \odot P[X_i = x_i | M_{J_i}, J_i, S_i] \\ &= P[X_i = x_i, M_{J_i}, J_i, S_i | X_{-i} = x_{-i}] \end{aligned}$$

The last equality followed from applying the same reasoning as in Proposition D.1.

Now we let  $B \in \mathbb{R}^{|\mathcal{M}| \times |\mathcal{M}||\mathcal{H}|}$  be the matrix such that

$$\begin{aligned} (BP[X_i = x_i, M_{J_i}, (J_i, H_i) | X_{-i} = x_{-i}])_m &= \\ \sum_s \Pr(X_i = x_i, M_{j^*} = m, J_i = j^*, S_i = s | X_{-i} = x_{-i}) \end{aligned}$$

Now we pick the last linear weight in the value function by  $b = B^\top \mu$ . It follows that for  $i \in \widehat{\mathcal{I}}$ ,

$$\begin{aligned} V(G_i(x), e(x_i)) &= b^\top ((\Theta^{(V)} G_i(x)) \odot e(x_i)) \\ &= \mu^\top B ((\Theta^{(V)} G_i(x)) \odot e(x_i)) \\ &= \mu^\top BP[X_i = x_i, M_{J_i}, J_i, S_i | X_{-i} = x_{-i}] \\ &= \mu^\top \sum_s P[X_i = x_i, M_{j^*}, J_i = j^*, S_i = s | X_{-i} = x_{-i}] \\ &= \mu^\top P[M_{j^*}, X_i = x_i | X_{-i} = x_{-i}] \end{aligned}$$

We obtained the last equality by observing that  $\sum_s P[X_i = x_i, M_{j^*}, J_i = j^*, S_i = s | X_{-i} = x_{-i}] = P[M_{j^*}, X_i = x_i | X_{-i} = x_{-i}]$  for  $i \in \widehat{\mathcal{I}}$ , as the distribution of  $H_i$  must concentrate where  $J_i = j^*$ . Finally, we observe that  $\mu^\top P[M_{j^*}, X_i = x_i | X_{-i} = x_{-i}] = \mu^\top P[M_{j^*} | X_{1:T} = x] \Pr(X_i = x_i | X_{-i} = x_{-i})$ , so setting  $r_{x,i} = \Pr(X_i = x_i | X_{-i} = x_{-i})$  completes the proof.  $\square$

Now we can complete the proof of Theorem 4.3.

*Proof of Theorem 4.3.* By applying Lemmas D.2 and D.4, we constructed key, query, and value functions for the attention head such that for all  $x \in \text{supp}(P[X])$  with  $\widehat{\mathcal{I}}$  (defined in Lemma D.2) nonempty, the attended-to positions  $\mathcal{I}$  satisfy  $\mathcal{I} = \widehat{\mathcal{I}}$ , and  $V(G_i(x), e(x_i)) = r_{x,i} \mu^\top P[M_{j^*} | X_{1:T} = x]$ . As the attention head computes the average of  $V(G_i(x), e(x_i))$  over attended-to positions, and  $r_{x,i}$  is positive for all  $i \in \widehat{\mathcal{I}}$ , we obtain the desired result.  $\square$

We note that this proof also works for the case where there is a single memory cell, as that is a special case where  $J_i = j^*$  always, and we only need to consider the evolution of  $S_i$ .

## D.2 Formal abstraction for prompt tuning in Section 4.2

We will work directly in the case with multiple memories, as the single memory case is captured in this setting. We follow the construction in Section C. our message passing formulation requires the augmented Markov chain  $\widetilde{H}_0 \triangleq (M_1, \dots, M_N, H_0)$ ,  $\widetilde{H}_1 \triangleq (M_1, \dots, M_N, H_1), \dots$ , which uses the following transition probabilities:

$$\Pr(\widetilde{H}_{i+1} = (m', h') | \widetilde{H}_i = (m, h)) = A_{h',h} \mathbb{1}(m' = m)$$

Let  $\widetilde{\mathcal{H}}$  denote the set of possible values for  $\widetilde{H}$ . For vector  $v \in \mathbb{R}^{|\mathcal{M}||\mathcal{H}|}$  we define a lifting function  $\eta : \mathbb{R}^{|\mathcal{M}||\mathcal{H}|} \rightarrow \mathbb{R}^{|\widetilde{\mathcal{H}}|}$  by

$$\eta(v)_{(m_{1:N}, j, s)} = v_{(m_j, j, s)}$$

We observe that  $\eta(P[X_i = x_i | M_{J_i}, (J_i, S_i)]) = P[X_i = x_i | \widetilde{H}_i]$ .

Now we formalize the model  $\overline{G}$ .  $\overline{G}$  will take embedding vectors  $v = (v_1, \dots, v_t)$  with  $v_i \in \mathbb{R}^{|\widetilde{\mathcal{H}}|}$  as follows. We define left and right messages  $\overleftarrow{\delta}_{i+1 \rightarrow i}(v)$  and  $\overrightarrow{\delta}_{i-1 \rightarrow i}(v)$  for  $i \in [t]$  via:

$$\begin{aligned} \overleftarrow{\delta}_{t+1 \rightarrow t}(v) &= P[\widetilde{H}_t] \\ \overleftarrow{\delta}_{i \rightarrow i-1}(v) &= P[\widetilde{H}_{i-1} | \widetilde{H}_i] (\overleftarrow{\delta}_{i+1 \rightarrow i}(v) \odot v_i) \quad \forall 1 < i < t \\ \overrightarrow{\delta}_{0 \rightarrow 1}(v) &= P[\widetilde{H}_1] \\ \overrightarrow{\delta}_{i \rightarrow i+1}(v) &= P[\widetilde{H}_{i+1} | \widetilde{H}_i] (\overrightarrow{\delta}_{i-1 \rightarrow i}(v) \odot v_i) \quad \forall 1 < i < t \end{aligned}$$

We observe that this definition almost matches Section C, except it replaces  $H$  with  $\widetilde{H}$ . Next, we define the aggregated message at timestep  $i$  by

$$\tau_i(v) = \begin{cases} \overleftarrow{\delta}_{2 \rightarrow 1}(v) & \text{if } i = 1 \\ \frac{\overleftarrow{\delta}_{i+1 \rightarrow i}(v) \odot \overrightarrow{\delta}_{i-1 \rightarrow i}(v)}{P[\widetilde{H}_i]} & \text{if } 1 < i < t \\ \overrightarrow{\delta}_{t-1 \rightarrow t}(v) & \text{if } i = t \end{cases} \quad (\text{D.3})$$

In the edge case where  $P[M]$  does not have full support, the coordinate-wise division in the definition above would sometimes divide by 0. However, for all these cases both of the corresponding terms in the numerator must also be 0, so we can simply set the value of  $\tau_i$  in this coordinate to 0. We will see that this preserves the meaning of the message  $\tau_i$ , which for the proper embeddings  $e(x_i) = P[X_i = x_i | \widetilde{H}_i]$ , with  $e(x) = (e(x_1), \dots, e(x_t))$ , computes

$$\tau_i(e(x)) = P[\widetilde{H}_i, X_{-i} = x_{-i}]$$

We can now define the reverse lifting function  $\phi : \mathbb{R}^{|\widetilde{\mathcal{H}}|} \rightarrow \mathbb{R}^{|\mathcal{M}||\mathcal{H}|}$  as follows:

$$(\phi(v))_{m_j, j, s} = \frac{1}{|\mathcal{M}|^{N-1}} \sum_{m_{-j}} v_{m_{1:N}, j, s} \quad (\text{D.4})$$

We observe that  $\phi(\tau_i(e(x))) = \frac{P[M_{J_i}, J_i, S_i, X_{-i} = x_{-i}]}{|\mathcal{M}|^{N-1}}$ . We now compute the model output as follows:

$$\overline{G}_i(v) = W \frac{\phi(\tau_i(v))}{\|\phi(\tau_i(v))\|_1}$$

In the edge case where  $\|\phi(\tau_i(v))\|_1 = 0$ , we again define  $\overline{G}(v) = \mathbf{0}_{|\mathcal{X}|}$ . We can observe that  $\overline{G}_i(e(x)) = P[X_i | X_{-i} = x_{-i}]$ .

The downstream classifier uses the embedding  $\hat{e}(x)$  defined as follows:

$$\hat{e}(x) = (u, e(x_1), \dots, e(x_t))$$

with a tunable prompt embedding  $u \in \mathbb{R}^{|\tilde{\mathcal{H}}|}$ . We also require a slightly modified attention head. The value function  $V$  in the attention head is slightly modified to accommodate the new embedding dimension. Letting  $V : \mathbb{R}^{|\mathcal{X}|} \times \mathbb{R}^{|\tilde{\mathcal{H}}|} \rightarrow \mathbb{R}$ ,

$$V(a, v) = b^\top ((\Theta^{(V)} a) \odot \phi(v))$$

The dimensions of the parameters  $b, \Theta^{(V)}$  remain unchanged. Note that when there is just a single memory, this reduces to the case in Section 4.

### D.3 Analysis for prompt tuning in the multiple memory setting

We will state and prove our result for the prompt tuning setting with multiple memories. For the multiple memory setting, the downstream classifier uses the following embedding function  $\hat{e}$ :

$$\hat{e}(x) = (u, \eta(e(x_1)), \dots, \eta(e(x_t)))$$

with a tunable prompt embedding  $u \in \mathbb{R}^{|\tilde{\mathcal{H}}|}$ . The attention head is changed so that the value function takes a larger dimensional embedding:

$$V(a, v) = b^\top ((\Theta^{(V)} a) \odot \phi(v))$$

where  $\phi$  is defined in (D.4). The following assumption extends Assumption 4.5 to the multiple memory case.

**Assumption D.5** (Multiple memories version of Assumption 4.5). *Let  $\mathcal{M}^* \triangleq \text{supp}(\mu)$  denote the set of non-zero coordinates in  $\mu$ . There exists a set of recoverable hidden states  $\mathcal{H}^*$ , such that the collection of token emission probabilities from  $\mathcal{M}^* \times \mathcal{H}^*$ ,  $\{W_{:, (m, h)}\}_{m \in \mathcal{M}^*, h \in \mathcal{H}^*}$ , is a linearly independent set of vectors.*

Furthermore, define the following span of vectors:

$$\overline{\mathcal{V}} \triangleq \text{span}(\{W_{:, (m, j^*, s)}\}_{m \in \mathcal{M}^*, s \in \mathcal{S} \setminus \mathcal{S}^*} \cup \{W_{:, (m, j, s)}\}_{m \in \mathcal{M}, j \neq j^*, s \in \mathcal{S}})$$

Then  $\overline{\mathcal{V}}$  must be disjoint from the span of token emission probabilities from  $\mathcal{M}^* \times \mathcal{H}^*$ :

$$\text{span}(\{W_{:, (m, h)}\}_{m \in \mathcal{M}^*, h \in \mathcal{H}^*}) \cap \overline{\mathcal{V}} = \{\mathbf{0}_{|\mathcal{X}|}\}$$

Note that Assumption D.5 reduces to Assumption 4.5 the case where  $N$ , the number of memory cells, is 1. In any case, it is a relaxation of Assumption 4.2.

We now state and prove the result for multiple memories.

**Theorem D.6.** *In the setting above, suppose that non-degeneracy Assumption D.5 and holds. In addition, suppose that Assumption 4.4 (stationarity) holds. Then there exists a prompt  $u$  and attention head on  $\overline{G}(\hat{e}(x))$  and the token embeddings which can compute the ground-truth  $F^*(x)$  for any  $x \in \mathcal{R}$ , defined in (4.3):*

$$F^*(x) = \mathbb{1}(\text{Attn}(\overline{G}_i(\hat{e}(x)), \hat{e}_i(x))_{i=1}^{t+1} \geq 0)$$

Here  $\hat{e}$  is the embedding in (4.4) and  $\text{Attn}$  is defined in (4.2).

We begin by rigorously stating the observation that soft prompt tuning is equivalent to adding a fake token  $\tilde{z}$  to the vocabulary and modifying the token emission probabilities at timestep 1, analogous to Lemma C.1.

**Lemma D.7.** *In the setting of Theorem D.6, define  $\tilde{H}$  as in Section D.2. Fix any prompt vector  $u \in [0, 1]^{|\tilde{\mathcal{H}}|}$ . Define the random variable  $\hat{X}$  with the same emission probabilities as  $X$  for  $i > 1$ :  $P[\hat{X}_i | \tilde{H}_i] = P[X_i | \tilde{H}_i]$ . For timestep 1, we define the emission probabilities of  $\hat{X}_1$  as follows:*

$$\begin{aligned} P[\hat{X}_1 = \tilde{z} | \tilde{H}_1] &= u \\ P[\hat{X}_1 = z | \tilde{H}_1] &= (1 - u) \odot P[X_1 = z | \tilde{H}_1] \quad \forall z \in \mathcal{X} \end{aligned}$$

In the above equations,  $\tilde{z}$  is a fake token added to the vocabulary at timestep 1. It follows that for any  $i$ , defining  $\tau_i$  as in (D.3)

$$\tau_i(\hat{e}(x)) = P[\tilde{H}_i, \hat{X}_{-i} = (\tilde{z}, x)_{-i}] \quad (\text{D.5})$$

As a consequence, it follows that for  $i > 1$  and any  $x$  such that  $(\tilde{z}, x)_{-i} \in \text{supp}(P[\hat{X}_{-i}])$ ,

$$\bar{G}_i(\hat{e}(x)) = P[\hat{X}_i | \hat{X}_{-i} = (\tilde{z}, x)_{-i}] = WP[M_{J_i}, J_i, S_i | \hat{X}_{-i} = (\tilde{z}, x)_{-i}]$$

For any  $i$  and  $x$  with  $(\tilde{z}, x)_{-i} \notin \text{supp}(P[\hat{X}_{-i}])$ ,  $\bar{G}_i(\hat{e}(x)) = \mathbf{0}$ .

The proof of Lemma D.7 mirrors the proof of Lemma C.1, so we omit it here.

In particular, throughout the proof we will use the following prompt  $u$ :

$$u_{m_{1:N}, j, s} = \begin{cases} 1 & \text{if } m_{j^*} \in \text{supp}(\mu) \\ 0 & \text{otherwise} \end{cases} \quad (\text{D.6})$$

We will also use the notation  $\hat{x} \triangleq (\tilde{z}, x_1, \dots, x_t)$ . The following lemma considers behaviors in edge cases with this choice of  $u$ .

Towards our proofs, the following result is useful.

**Proposition D.8.** *In the setting of Theorem D.6, where  $P[H_0]$  is the stationary distributions satisfying  $P[H_0] = AP[H_0]$ , it holds that*

$$P[M, H_i, X_{i+1:i+t}] = P[M, H_0, X_{1:t}]$$

for any  $t \geq 1$ ,  $i \geq 1$ .

*Proof.* Because  $P[H_0]$  is stationary, we observe that  $P[M, H_i] = P[M, H_0]$  for all  $i$ . We write

$$\begin{aligned} P[X_{i+1:i+t}, M = m, H_i = h] &= P[X_{i+1:i+t} | M = m, H_i = h] \Pr(M = m, H_i = h) \\ &= P[X_{1:t} | M = m, H_0 = h] \Pr(M = m, H_i = h) \\ &\quad \text{(by time-invariance of HMMs)} \\ &= P[X_{1:t} | M = m, H_0 = h] \Pr(M = m, H_0 = h) \end{aligned}$$

□

We will now restrict our focus to the set of inputs

$$\mathcal{Z} \triangleq \{x : \Pr(\hat{X}_{-i} = (\tilde{z}, x)_{-i}) > 0 \forall i \in [t]\} \quad (\text{D.7})$$

We also define the set

$$\hat{\mathcal{I}} \triangleq \{i + 1 : \text{supp}(P[S_i | X_{-i} = x_{-i}]) \subseteq \mathcal{S}^*, \text{supp}(P[J_i | X_{-i} = x_{-i}]) \subseteq \{j^*\}, i \in [t]\} \quad (\text{D.8})$$

Here  $\mathcal{S}^*$  is defined in the non-degeneracy assumption. We will first construct key and query parameters such that the set of attended-to positions is precisely  $\hat{\mathcal{I}}$ , following the proof of Theorem 4.3.

**Lemma D.9** (Analogue to Lemma D.2). *In the setting of Theorem D.6 and above, define  $u$  as in (D.6). There are parameters  $\Theta^{(K)} \in \mathbb{R}^{(|\mathcal{H}|+1) \times |\mathcal{X}|}$ ,  $q \in \mathbb{R}^{|\mathcal{H}|+1}$ , and  $\beta_1, \beta_2, \dots \in \mathbb{R}^{|\mathcal{H}|+1}$  such that for any  $x \in \mathcal{Z}$  where  $\hat{\mathcal{I}}$  is nonempty, the set of attended-to positions  $\mathcal{I}$  (defined in (4.1)) satisfies  $\mathcal{I} = \hat{\mathcal{I}}$ .*

Towards proving Lemma D.9, the following construction will be useful.

**Claim D.10** (Analogue of Claim D.3). *In the setting of Theorem D.6, define  $\mathcal{H}^*$  as in Assumption D.5. There is a matrix  $\Theta^{(1)} \in \mathbb{R}^{|\mathcal{H}| \times |\mathcal{X}|}$  such that for all  $x \in \text{supp}(P[X])$ , and  $i > 1$  with  $\Pr(\hat{X}_{-i} = \hat{x}_{-i}) > 0$ ,  $(\Theta^{(1)} \bar{G}_i(\hat{e}(x)))_h = P[H_i = h | \hat{X}_{-i} = \hat{x}_{-i}]$  for any  $h \in \mathcal{H}^*$ . Furthermore,  $\|\Theta^{(1)} \bar{G}_i(\hat{e}(x))\|_1 = 1$ .*

*In addition, for  $s \in \mathcal{S}^*$ , there exists  $\Theta^{(2,s)} \in \mathbb{R}^{|\mathcal{M}| \times |\mathcal{X}|}$  such that for all  $i > 1$  and  $x$  with  $\Pr(\hat{X}_{-i} = \hat{x}_{-i}) > 0$ ,*

$$\Theta^{(2,s)} \bar{G}_i(\hat{e}(x)) = P[M_{j^*}, H_i = (j^*, s) | \hat{X}_{-i} = \hat{x}_{-i}]$$

Our proof will require the following result which shows that the distribution of  $M_{j^*}$  has limited support.

**Proposition D.11.** *In the setting of Theorem D.6 and Lemma D.7, let  $u$  be defined as in (D.6). Then for all  $i > 1$ ,  $\text{supp}(P[M_{j^*} | \widehat{X}_{-i} = \widehat{x}_{-i}]) \subseteq \text{supp}(\mu)$  if  $\Pr(\widehat{X}_{-i} = \widehat{x}_{-i}) > 0$ .*

*Proof.* We have

$$\begin{aligned} P[M_{j^*} | \widehat{X}_{-i} = \widehat{x}_{-i}] &= \sum_{m_{-j^*}, h} P[M_{j^*}, M_{-j^*} = m_{-j^*}, H_1 = h | \widehat{X}_{-i} = \widehat{x}_{-i}] \\ &= \sum_{m_{-j^*}, h} \frac{P[\widehat{X}_1 = \widehat{z} | M_{j^*}, M_{-j^*} = m_{-j^*}, H_1 = h] \odot P[M_{j^*}, M_{-j^*} = m_{-j^*}, H_1 = h | \widehat{X}_{-(1,i)} = \widehat{x}_{-(1,i)}]}{\Pr(\widehat{X}_1 = \widehat{z} | \widehat{X}_{-(1,i)} = \widehat{x}_{-(1,i)})} \end{aligned}$$

In this equation we used  $_{-(1,i)}$  to index all but the first and  $i$ -th element of the sequence. We note that  $\text{supp}(P[\widehat{X}_1 = \widehat{z} | M_{j^*}, M_{-j^*} = m_{-j^*}, H_1 = h]) = \text{supp}(\mu)$  for all  $m_{-j^*}, h$ , so the desired statement follows.  $\square$

Now we complete the proof of Claim D.10.

*Proof of Claim D.10.* The proof of this statement will be analogous to Claim D.3. As before, we have

$$\begin{aligned} G_i(\widehat{e}(x)) &= \sum_{h=(j,s)} \left( \sum_m W_{:, (m,j,s)} \Pr(M_j = m, H_i = h | \widehat{X}_{-i} = \widehat{x}_{-i}) \right) \\ &= \sum_{h=(j,s)} \nu^{(h)} \end{aligned}$$

In the last equality, we defined  $\nu^{(h)}$  to be the expression in the parentheses. We consider several cases. First, when  $h = (j^*, s)$  for  $s \in \mathcal{S}$ , we must have that when  $i > 1$ ,  $P[M_{j^*} | \widehat{X}_{-i} = \widehat{x}_{-i}]$  is supported on  $\mathcal{M}^*$  by Proposition D.11. Thus,  $\nu^{(h)} \in \mathcal{V}^{(h)} \triangleq \text{span}(\{W_{:, (m,h)}\}_{m \in \mathcal{M}^*})$ . As a result, for  $h \notin \mathcal{H}^*$ ,  $\nu^{(h)} \in \bar{\mathcal{V}}$ , which is the span of vectors defined in Assumption D.5. As the spans  $(\mathcal{V}^{(h)})_{h \in \mathcal{H}^*}$  and  $\bar{\mathcal{V}}$  are all pairwise disjoint, by Assumption 4.2, for each  $h \in \mathcal{H}^*$ , we can recover

$$\nu^{(h)} = B^{(h)} P[X_i | X_{-i} = x_{-i}]$$

Likewise, we can obtain

$$\sum_{h \notin \mathcal{H}^*} \nu^{(h)} = \bar{B} P[X_i | X_{-i} = x_{-i}]$$

The remainder of this proof for the construction of  $\Theta^{(1)}$  follows the same steps as Claim D.3.

For the second part about constructing  $\Theta^{(2,s)}$ , we modify Claim D.3 in a few ways. First, each  $\nu^{(j^*, s)}$  is recoverable as a linear function of  $\bar{G}_i(\widehat{e}(x))$  when  $s \in \mathcal{S}^*$ . Now using  $\mathcal{M}^* \subseteq \mathcal{M}$  as shorthand for  $\text{supp}(\mu)$ , we define the matrix  $W_{:, (\mathcal{M}^*, j^*, s)}^\dagger \in \mathbb{R}^{|\mathcal{M}^*| \times |\mathcal{X}|}$  to be the left inverse of  $W_{:, (\mathcal{M}^*, j^*, s)}$ , the matrix with columns  $\{W_{:, (m, j^*, s)}\}_{m \in \mathcal{M}^*}$ . This left inverse exists by the non-degeneracy assumptions. Now we construct the matrix  $\widehat{W}_{:, (\mathcal{M}^*, j^*, s)}^\dagger \in \mathbb{R}^{|\mathcal{M}| \times |\mathcal{X}|}$ , where the  $m$ -th row of  $\widehat{W}_{:, (\mathcal{M}^*, j^*, s)}^\dagger$  matches the corresponding row of  $W_{:, (\mathcal{M}^*, j^*, s)}^\dagger$  if  $m \in \mathcal{M}^*$  and is  $\mathbf{0}$  otherwise.

We observe that because  $\text{supp}(P[M_{j^*}, H_i = (j^*, s) | \widehat{X}_{-i} = \widehat{x}_{-i}]) \subseteq \mathcal{M}^*$  by Proposition D.11, we can finish the proof by repeating the argument of Claim D.3.  $\square$

The following claim relating the support of  $H_i$  conditioned on  $\widehat{X}$  to the support of  $H_i$  conditioned on  $X$  will also be useful.

**Claim D.12.** *In the setting of Theorem D.6 and Lemma D.7, suppose that  $u$  is defined as in (D.6). For  $i > 1$  with  $\Pr(\widehat{X}_{-i} = \widehat{x}_{-i}) > 0$ , we have*

$$\text{supp}(P[H_i | \widehat{X}_{-i} = \widehat{x}_{-i}]) \subseteq \text{supp}(P[H_{i-1} | X_{-(i-1)} = x_{-(i-1)}])$$



*Proof.* We have

$$\begin{aligned}
P[H_i | \widehat{X}_{-i} = \widehat{x}_{-i}] &= \sum_{m,h} P[M = m, H_1 = h, H_i | \widehat{X}_{-i} = \widehat{x}_{-i}] = \\
&= \frac{\sum_{m,h} \Pr(\widehat{X}_1 = \tilde{z} | M = m, H_1 = h) P[M = m, H_1 = h, H_i | \widehat{X}_{2:i-1} = \widehat{x}_{2:i-1}, \widehat{X}_{i+1:T+1} = \widehat{x}_{i+1:t+1}]}{\Pr(X_1 = \tilde{z} | \widehat{X}_{2:i-1} = \widehat{x}_{2:i-1}, \widehat{X}_{i+1:T+1} = \widehat{x}_{i+1:t+1})} \\
&= \frac{\sum_{m,h} \Pr(\widehat{X}_1 = \tilde{z} | M = m, H_1 = h) P[M = m, H_0 = h, H_{i-1} | X_{-(i-1)} = x_{-(i-1)}]}{\Pr(X_1 = \tilde{z} | \widehat{X}_{2:i-1} = \widehat{x}_{2:i-1}, \widehat{X}_{i+1:T+1} = \widehat{x}_{i+1:t+1})}
\end{aligned} \tag{D.9}$$

The last line used the time-invariance property of the HMM (Proposition D.8), the definition of  $\widehat{x}$ , and the fact that  $P[\widehat{X}_i | H_i, M]$  is distributed the same as  $P[X_i | H_i, M]$  for  $i > 1$ . On the other hand, note that  $P[H_{i-1} | X_{-(i-1)} = x_{-(i-1)}] = \sum_{m,h} P[M = m, H_0 = h, H_{i-1} | X_{-(i-1)} = x_{-(i-1)}]$ . This involves a sum over the same terms in the numerator in (D.9). Thus, as all the terms in the sum of (D.9) are nonnegative, the desired statement follows.  $\square$

This lets us complete the proof of Lemma D.9.

*Proof of Lemma D.9.* By setting  $\Theta^{(K)} = \begin{bmatrix} \Theta^{(1)} \\ \mathbf{0} \end{bmatrix}$ , where  $\Theta^{(1)}$  is defined in Claim D.10, we obtain  $K$  such that for all  $i > 1$ ,  $(K(\overline{G}_i(\widehat{e}(x))))_h = \Pr(H_i = h | \widehat{X}_{-i} = \widehat{x}_{-i})$  for  $h \in \mathcal{H}^*$ . Furthermore,  $(K(\overline{G}_i(\widehat{e}(x))))_{|\mathcal{H}|+1} = 0$ , and  $\|K(\overline{G}_i(\widehat{e}(x)))\|_1 = 1$ . We choose  $\beta_1 = \begin{bmatrix} \mathbf{0}_{|\mathcal{H}|} \\ -2 \end{bmatrix}$  and  $\beta_i = \mathbf{0}_{|\mathcal{H}|+1}$  for  $i > 1$ . We also construct  $q$  so that the first  $|\mathcal{H}|$  dimensions are the indicator on the set  $\{j^*\} \times \mathcal{S}^*$ . We set  $q_{|\mathcal{H}|+1} = 1$ . Note that this construction ensures that for  $i > 1$ ,  $1 = \|K(\overline{G}_i(\widehat{e}(x)))\|_1 \geq q^\top (K(\overline{G}_i(\widehat{e}(x))) + \beta_i) \geq 0$ . Note that for  $i \in \widehat{\mathcal{I}}$ , by Claim D.12 we have  $\text{supp}(P[H_i | \widehat{X}_{-i} = \widehat{x}_{-i}]) \subseteq \text{supp}(P[H_{i-1} | X_{-(i-1)} = x_{-(i-1)}]) \subseteq \{j^*\} \times \mathcal{S}^*$ . Thus, for such  $i \in \widehat{\mathcal{I}}$ , we have  $q^\top (K(\overline{G}_i(\widehat{e}(x))) + \beta_i) = 1$ , achieving the maximum over all positions. Finally, we note that  $1 \notin \mathcal{I}$  because the position embedding  $\beta_1$  ensures that  $q^\top (K(\overline{G}_1(\widehat{e}(x))) + \beta_1) \leq -1$ . Thus,  $\mathcal{I} = \widehat{\mathcal{I}}$ , as desired.  $\square$

Next, the following lemma constructs the value function, analogously to Lemma D.4.

**Lemma D.13** (Analogue to Lemma D.4). *In the setting of Theorem D.6 and Lemma D.7, define  $u$  as in (D.6), and  $\widehat{\mathcal{I}}$  as in (D.8). We can choose the parameters of the value function  $V$ ,  $\Theta^{(V)} \in \mathbb{R}^{|\mathcal{M}||\mathcal{H}| \times |\mathcal{X}|}$ ,  $b \in \mathbb{R}^{|\mathcal{M}||\mathcal{H}|}$ , such that for  $x \in \text{supp}(P[X])$  where  $\widehat{\mathcal{I}}$  is nonempty, for all  $i \in \widehat{\mathcal{I}}$  with  $\Pr(\widehat{X}_{-i} = \widehat{x}_{-i}) > 0$ ,*

$$V(\overline{G}_i(\widehat{e}(x)), \widehat{e}_i(x)) = \mu^\top P[\widehat{X}_i = \widehat{x}_i, M_{j^*} | \widehat{X}_{-i} = \widehat{x}_{-i}]$$

As a consequence, for all  $i \in \widehat{\mathcal{I}}$ ,

$$V(\overline{G}_i(\widehat{e}(x)), \widehat{e}_i(x)) = r_{x,i} \mu^\top P[M_{j^*} | X = x]$$

where  $r_{x,i} > 0$  is a positive scalar. In particular, this holds regardless of whether  $\Pr(\widehat{X}_{-i} = \widehat{x}_{-i}) > 0$ . Furthermore, when  $\widehat{x} \notin \text{supp}(P[\widehat{X}])$ , for all  $i > 1$ , we must have

$$V(\overline{G}_i(\widehat{e}(x)), \widehat{e}_i(x)) = 0$$

We rely on the following claim.

**Claim D.14.** *In the setting of Theorem D.6 and Lemma C.1 where  $u$  takes the value in in (D.6), for all  $x$  where  $\widehat{x} \triangleq (\tilde{z}, x) \in \text{supp}(P[\widehat{X}])$ , we have*

$$\mu^\top P[M_{j^*} | \widehat{X} = \widehat{x}] = \frac{\mu^\top P[M_{j^*} | X_{1:T} = x]}{\Pr(\widehat{X}_1 = \tilde{z} | \widehat{X}_{2:T+1} = \widehat{x}_{2:t+1})}$$

*Proof.* We observe that

$$\begin{aligned}
& \mu^\top P[M | \widehat{X} = \widehat{x}] \\
& \hspace{15em} \text{(D.10)} \\
& = \mu^\top \sum_h \sum_{m_{-j^\star}} P[M_{j^\star}, M_{-j^\star} = m_{-j^\star}, H_1 = h | \widehat{X} = \widehat{x}] \\
& = \mu^\top \frac{\sum_h \sum_{m_{-j^\star}} P[\widehat{X}_1 = \tilde{z} | M_{j^\star}, M_{-j^\star} = m_{-j^\star}, H_1 = h] \odot P[M_{j^\star}, M_{-j^\star} = m_{-j^\star}, H_1 = h | \widehat{X}_{2:T+1} = \widehat{x}_{2:t+1}]}{\Pr(\widehat{X}_1 = \tilde{z} | \widehat{X}_{2:T+1} = \widehat{x}_{2:t+1})} \\
& = \mu^\top \frac{\sum_h \sum_{m_{-j^\star}} P[\widehat{X}_1 = \tilde{z} | M_{j^\star}, M_{-j^\star} = m_{-j^\star}, H_1 = h] \odot P[M_{j^\star}, M_{-j^\star} = m_{-j^\star}, H_0 = h | X_{1:T} = x]}{\Pr(\widehat{X}_1 = \tilde{z} | \widehat{X}_{2:T+1} = \widehat{x}_{2:t+1})} \\
& \hspace{15em} \text{(by Proposition D.8 and the definition of } \widehat{X})
\end{aligned}$$

Now we have  $\mu^\top \text{diag}(P[\widehat{X}_1 = \tilde{z} | M_{j^\star}, M_{-j^\star} = m_{-j^\star}, H_1 = h]) = \mu^\top$  because by construction,  $P[\widehat{X}_1 = \tilde{z} | M_{j^\star}, M_{-j^\star} = m_{-j^\star}, H_1 = h]$  is only supported on  $\text{supp}(\mu)$  and equals 1 on the support. Thus, we obtain

$$\begin{aligned}
\mu^\top P[M_{j^\star} | \widehat{X} = \widehat{x}] &= \frac{\sum_h \mu^\top P[M_{j^\star}, H_0 = h | X_{1:T} = x]}{\Pr(\widehat{X}_1 = \tilde{z} | \widehat{X}_{2:T+1} = \widehat{x}_{2:t+1})} \\
&= \frac{\mu^\top P[M_{j^\star} | X_{1:T} = x]}{\Pr(\widehat{X}_1 = \tilde{z} | \widehat{X}_{2:T+1} = \widehat{x}_{2:t+1})}
\end{aligned}$$

□

We also require the following result to handle edge cases where probability values are 0.

**Claim D.15.** *In the setting of Theorem D.6 and Lemma D.7, define  $u$  as in (D.6). Consider an input  $x \in \text{supp}(P[X])$  such that  $\widehat{x} \triangleq (\tilde{z}, x_1, \dots, x_t)$  satisfies  $\Pr(\widehat{X} = \widehat{x}) = 0$ . Then  $\mu^\top P[M_{j^\star} | X_{1:T} = x] = 0$ . Furthermore, for any  $x$  where  $\Pr(\widehat{X}_{-i} = \widehat{x}_{-i}) = 0$  for some  $i$ , we must have  $\overline{G}_i(\widehat{e}(x)) = \mathbf{0}_{|\mathcal{X}|}$ .*

*Proof.* First, we observe that

$$\begin{aligned}
0 &= \Pr(\widehat{X} = \widehat{x}) \\
&= P[\widehat{X}_1 = \tilde{z} | M, H_1]^\top P[M, H_1, \widehat{X}_{-1} = \widehat{x}_{-1}] \\
&= u^\top P[M, H_0, X = x] \hspace{10em} \text{(by Proposition D.8 and Lemma D.7)}
\end{aligned}$$

In particular, as  $\text{supp}(u) \cap \text{supp}(P[M, H_0, X_{1:T} = x]) = \emptyset$ , it follows that  $\Pr(M_{j^\star} = m, H_0 = h, X_{1:T} = x) = 0$  for all  $m \in \text{supp}(\mu)$  and any  $h$ , by the construction of  $u$ . Since  $x \in \text{supp}(P[X])$ , it follows that  $\Pr(M_{j^\star} = m | X_{1:T} = x) = 0$  for all  $m \in \text{supp}(\mu)$ , so  $\mu^\top P[M_{j^\star} | X_{1:T} = x] = 0$ .

We note that the statement about  $\overline{G}_i(\widehat{e}(x))$  follows because of Lemma D.7. □

*Proof of Lemma D.13.* To construct the value function, we define  $\Theta^{(V)}$  in the same manner as Lemma D.4, such that  $\Theta^{(V)}$  contains  $\Theta^{(2,s)}$  constructed in Claim D.10 as a submatrix:  $\Theta_{(m,j^\star,s),:}^{(V)} = \Theta_{m,:}^{(2,s)}$  for  $s \in \mathcal{S}^\star$ . All other rows of  $\Theta^{(V)}$  are  $\mathbf{0}$ . It now follows that for  $i \in \widehat{\mathcal{I}}$  and  $x$  where  $\Pr(\widehat{X}_{-i} = \widehat{x}_{-i}) > 0$ , by definition of  $\widehat{\mathcal{I}}$ ,

$$(\Theta^{(V)} \overline{G}_i(\widehat{e}(x))) \odot \phi(e(x_i)) = P[\widehat{X}_i = \widehat{x}_i, M_{J_i}, (J_i, S_i) | \widehat{X}_{-i} = \widehat{x}_{-i}]$$

The proof that this claim is correct follows the same reasoning as Lemma D.4, where we argue that  $P[H_i | \widehat{X}_{-i} = \widehat{x}_{-i}]$  must concentrate on  $\{j^\star\} \times \mathcal{S}^\star$  for all  $i \in \widehat{\mathcal{I}}$ . Thus, we can define  $b = B^\top \mu$ , where  $B$  is defined in Lemma D.4. We observe that for  $i \in \widehat{\mathcal{I}}$ , the same reasoning as before gives

$$V(\overline{G}_i(\widehat{e}(x)), \widehat{e}_i(x)) = \mu^\top P[\widehat{X}_i = \widehat{x}_i, M_{j^\star} | \widehat{X}_{-i} = \widehat{x}_{-i}]$$

First, if  $(\tilde{z}, x) \notin \text{supp}(P[\widehat{X}])$ , by Claim D.15, we have  $\mu^\top P[M_{j^\star} | X_{1:T} = x] = 0$ . The expression above must also equal 0, as  $(\tilde{z}, x) \notin \text{supp}(P[\widehat{X}])$ . Otherwise, we have

$$V(\overline{G}_i(\widehat{e}(x)), \widehat{e}_i(x)) = \mu^\top P[M_{j^\star} | \widehat{X} = \widehat{x}] \Pr(\widehat{X}_i = \widehat{x}_i | \widehat{X}_{-i} = \widehat{x}_{-i})$$

Now we apply Claim D.14 to get the desired result in this case. A additional case is when  $\Pr(\widehat{X}_{-i} = \widehat{x}_{-i}) = 0$ . In this case, Claim D.15 shows that  $\overline{G}_i(\widehat{e}(x)) = \mathbf{0}$ , so it follows that the value function also computes 0 in this case.

Finally, we need to check the case where  $\widehat{x} \notin \text{supp}(P[\widehat{X}])$ , and we want to show  $V(\overline{G}_i(\widehat{e}(x)), \widehat{e}_i(x)) = 0$  for all  $i > 1$ . The case where  $\Pr(\widehat{X}_{-i} = \widehat{x}_{-i}) = 0$  is already handled above. In the case where  $\Pr(\widehat{X}_{-i} = \widehat{x}_{-i}) > 0$ , we can apply Claim D.10 to our construction for  $\Theta^{(V)}$  to get

$$(\Theta^{(V)}\overline{G}_i(\widehat{e}(x)))_{m,h} = \begin{cases} P[M_{j^*} = m, H_i = (j^*, s) \mid \widehat{X}_{-i} = \widehat{x}_{-i}] & \text{if } h = (j^*, s) \text{ for } s \in \mathcal{S}^* \\ 0 & \text{otherwise} \end{cases}$$

Thus, taking the element-wise product with  $\phi(e(x_i)) = P[\widehat{X}_i = \widehat{x}_i \mid M_{J_i}, J_i, S_i]$ , we must have, by Proposition D.1,

$$((\Theta^{(V)}\overline{G}_i(\widehat{e}(x))) \odot \phi(e(x_i)))_{m,h} = \begin{cases} P[\widehat{X}_i = \widehat{x}_i, M_{j^*} = m, H_i = (j^*, s) \mid \widehat{X}_{-i} = \widehat{x}_{-i}] & \text{if } h = (j^*, s) \text{ for } s \in \mathcal{S}^* \\ 0 & \text{otherwise} \end{cases}$$

Both of these terms must be 0 since  $\widehat{x} \notin \text{supp}(P[\widehat{X}])$ , giving the desired result.  $\square$

Now we are ready to prove Theorem D.6.

*Proof of Theorem D.6.* The first case we consider is when  $x \in \mathcal{Z}$ , defined in (D.7). By applying Lemmas D.9 and D.13, we constructed key, query, and value functions for the attention head such that when  $\widehat{\mathcal{I}}$  (D.8) is nonempty, the attended-to positions  $\mathcal{I}$  satisfy  $\mathcal{I} = \widehat{\mathcal{I}}$ . In addition, by applying Lemma D.13, we also obtain that for  $x \in \text{supp}(P[X])$ ,  $V(\overline{G}_i(\widehat{e}(x)), \widehat{e}_i(x)) = r_{x,i} \mu^\top P[M_{j^*} \mid X_{1:T} = x]$ . As the attention head averages  $V(\overline{G}_i(\widehat{e}(x)), \widehat{e}_i(x))$  over the attended-to positions, and  $r_{x,i}$  is positive for all  $i \in \widehat{\mathcal{I}}$ , we obtain the desired result.

In the second case,  $x \notin \mathcal{Z}$ , so  $(\tilde{z}, x) \notin \text{supp}(P[\widehat{X}])$ . By Lemma D.13, for all  $i > 1$ , the value function outputs 0. However, by the construction in Lemma D.9, the attention will only attend to  $i > 1$ . Thus, the output of the attention head is 0. However, Claim D.15 also implies that  $\mu^\top P[M_{j^*} \mid X_{1:T} = x] = 0$ , giving the desired result.  $\square$

## E Experimental details

**Generating HMM parameters.** For all experiments, we randomly generated the parameters of an HMM with 10 output symbols in its vocabulary. We generate a random transition matrix by taking a random convex combination of random permutation matrices. We mix as many permutation matrices as there are hidden states; i.e. if there are 4 hidden states, then we mix 4 random permutation matrices. The mixing weights are generated by sampling logits IID from a uniform distribution on  $[0, 1]$  and then taking a softmax with temperature 0.01. Although this is a small temperature, the transition probabilities can still be around 0.7 for some transitions. The start distribution is also sampled in the same way, but with softmax temperature 10.0. The rows of the emission probability matrix is also sampled the same way with temperature 0.01.

**Pretrain model.** The pretrained model follows the BERT-base architecture, except with 6 layers and a much smaller vocab size.

**Pretrain data and task.** The pretraining data consists of 5000 sequences (documents) generated from the HMM, each with length 10240. We pretrain on this data by doing 5% masked LM on chunks of length 512. Pretraining runs for 3 epochs and takes about 5 hours on a single NVIDIA Tesla K80 GPU on 16-bit precision. We use an internal cluster for all experiments. Pretraining uses batch size 8 and learning rate  $1e-5$  with a linear warmup of 500 steps and linear decay schedule after 500 steps.

We generated 20 pretraining (and downstream) datasets for each problem instance and average over the 20 runs in the vanilla HMM comparison, while the memory-based distributions are run for 5 trials of pretraining and finetuning.

**Downstream.** The downstream task samples a sparse ground truth linear weight  $\mu$  with 6 nonzero elements. Positions for nonzero entries are sampled uniformly at random and values are sampled i.i.d. from a standard normal distribution. Although we do binary classification, we sample  $\mu$  with 2 rows and take the label to be the argmax of the two scores, instead of having 1 row and taking the sign. We find that this results in less degenerate datasets (datasets where all labels are the same).

We generate 5000 training, 500 validation and 1000 test examples for the downstream tasks. Downstream training uses learning rate 0.01 for both prompt tuning and head tuning, with a linear warmup/decay schedule, for 5 epochs over the downstream data. We take the model returned at the last checkpoint as the result (no early stopping). We found that it was important to train prompt tuning with full precision, since the gradients are relatively small and become zero with discretization.

We used message passing in the HMM to compute the posterior distributions of the latent variables analytically.

**Prompt tuning.** We prepended a length 20 continuous prompt to each sequence of input word embeddings. We initialize elements of the prompt vectors IID from the uniform distribution on  $[-0.5, 0.5]$ . Our implementation for prompt tuning used the code of [19], available at <https://github.com/kipgparker/soft-prompt-tuning>.
